# Supplementary material for: Improved parental understanding by an enhanced informed consent form: a randomized controlled study nested in a paediatric drug trial
Source: PubMed Central journal article supplement — BMJ Open. 2019 Nov 26;9(11):e029530. doi: 10.1136/bmjopen-2019-029530 (PMC6887000; doi:10.1136/bmjopen-2019-029530), 2019-11-26
Supplement: bmjopen-2019-029530.draft_revisions.pdf [file bmjopen-2019-029530.draft_revisions.pdf]

# BMJ Open

BMJ Open is committed to open peer review. As part of this commitment we make the peer review history of every article we publish publicly available.

When an article is published we post the peer reviewers' comments and the authors' responses online. We also post the versions of the paper that were used during peer review. These are the versions that the peer review comments apply to.

The versions of the paper that follow are the versions that were submitted during the peer review process. They are not the versions of record or the final published versions. They should not be cited or distributed as the published version of this manuscript.

BMJ Open is an open access journal and the full, final, typeset and author-corrected version of record of the manuscript is available on our site with no access controls, subscription charges or pay-per-view fees (<http://bmjopen.bmj.com>).

If you have any questions on BMJ Open's open peer review process please email [info.bmjopen@bmj.com](mailto:info.bmjopen@bmj.com)

# BMJ Open

## Improved parental understanding in a pediatric drug trial by an enhanced informed consent form: a randomized controlled study

|                               |                                                                                                                                                                                                                                                            |
|-------------------------------|------------------------------------------------------------------------------------------------------------------------------------------------------------------------------------------------------------------------------------------------------------|
| Journal:                      | <i>BMJ Open</i>                                                                                                                                                                                                                                            |
| Manuscript ID                 | bmjopen-2019-029530                                                                                                                                                                                                                                        |
| Article Type:                 | Research                                                                                                                                                                                                                                                   |
| Date Submitted by the Author: | 30-Jan-2019                                                                                                                                                                                                                                                |
| Complete List of Authors:     | Koonrungsomboon, Nut; Chiang Mai University Faculty of Medicine Traivaree, Chanchai; Phramongkutklao College of Medicine Tiyaapsane, Charnunnut; Phramongkutklao College of Medicine Karbwang, Juntra; Institute of Tropical Medicine, product development |
| Keywords:                     | Informed consent, Parental consent, Consent forms, Pediatrics, Comprehension                                                                                                                                                                               |
|                               |                                                                                                                                                                                                                                                            |

SCHOLARONE™  
Manuscripts

**TITLE PAGE**

**Title:** Improved parental understanding in a pediatric drug trial by an enhanced informed consent form: a randomized controlled study

**Author names and affiliations:** Nut Koonrunsesomboon<sup>1</sup>, Chanchai Traivaree<sup>2</sup>, Charnunnut Tiypsane<sup>2</sup>, Juntra Karbwang<sup>3</sup>

<sup>1</sup>Department of Pharmacology, Faculty of Medicine, Chiang Mai University, Chiang Mai, Thailand.

<sup>2</sup>Department of Pediatrics, Phramongkutklo Hospital and Phramongkutklo College of Medicine, Bangkok, Thailand.

<sup>3</sup>Department of Clinical Product Development, Institute of Tropical Medicine, Nagasaki University, Nagasaki, Japan.

**Corresponding author:** Juntra Karbwang, M.D., Ph.D., Department of Clinical Product Development, Institute of Tropical Medicine, Nagasaki University, 1-12-4 Sakamoto, Nagasaki 852-8523, Japan, Tel: +81-95-819-7558, Fax: +81-95-819-7846, Email address: karbwangj@nagasaki-u.ac.jp or jkarbwang@yahoo.com

**Email address:** Nut Koonrunsesomboon: nkoonrung@gmail.com; Chanchai Traivaree: ctrivaree@yahoo.com; Charnunnut Tiypsane: charnunnut332@gmail.com; Juntra Karbwang: jkarbwang@yahoo.com

**Key words:** Informed consent; Parental consent; Pediatrics; Consent forms; Comprehension.

1  
2  
3  
4 **20 Abstract**  
5  
6

7 *Objective:* This study aimed to evaluate the applicability and effectiveness of the enhanced  
8  
9  
10 *informed consent form (ICF) methodology, proposed by the Strategic Initiative for Developing*  
11  
12  
13 *Capacity in Ethical Review (SIDCER), in pediatric research requiring parental consent.*  
14

15  
16 *Design:* A prospective, randomized-controlled design.  
17

18  
19 *Setting:* Pediatric Outpatients Department, Phramongkutklo Hospital, Thailand.  
20  
21

22 *Participants:* 210 parents of children with thalassemia.  
23  
24

25 *Interventions:* The participants were randomly assigned to read either the SIDCER ICF ( $n =$   
26  
27  
28 105) or the conventional ICF ( $n = 105$ ) of a pediatric drug trial.  
29

30 *Primary and secondary outcome measures:* Parental understanding of trial information was  
31  
32  
33  
34 determined using 24 scenario-based questions. The primary endpoint was the proportion of  
35  
36  
37 parents who obtained the understanding score of more than 80%, and the secondary endpoint  
38  
39  
40 was the total score.  
41

42  
43 *Results:* Forty-five parents (42.9%) in the SIDCER ICF group and 29 parents (27.6%) in the  
44  
45  
46 conventional ICF group achieved the primary endpoint (relative risk = 1.552, 95%CI = 1.061  
47  
48  
49 to 2.270,  $p = 0.021$ ). The median total scores of the parents in the SIDCER ICF group and in  
50  
51  
52 the conventional ICF group were 19/24 and 17/24, respectively ( $p = 0.001$ ).  
53  
54  
55  
56  
57  
58  
59  
60

1  
2  
3  
4  
5  
6  
7  
8  
9  
10  
11  
12  
13  
14  
15  
16  
17  
18  
19  
20  
21  
22  
23  
24  
25  
26  
27  
28  
29  
30  
31  
32  
33  
34  
35  
36  
37  
38  
39  
40  
41  
42  
43  
44  
45  
46  
47  
48  
49  
50  
51  
52  
53  
54  
55  
56  
57  
58  
59  
60

37 *Conclusions:* The SIDCER ICF was found to be superior to the conventional ICF in improving  
38 parental understanding of several elements of the ICF content. Further improvement on the ICF  
39 for this group of population is required as deficiencies in understanding were still prevalent.

For peer review only

1  
2  
3  
4 **40 Strengths and limitations of the study**  
5  
6

- 7 41 • This randomized-controlled study provides evidence that an informed consent form  
8  
9  
10 42 (ICF) for parental consent of pediatric research could be improved, using the SIDCER  
11  
12  
13 43 ICF methodology.  
14  
15  
16 44 • This study was confined to parental understanding of ICFs while children's  
17  
18  
19 45 understanding of an assent form was not studied.  
20  
21  
22 46 • The findings were largely confined to research contexts in Thailand and may not  
23  
24  
25 47 account for other settings.  
26  
27  
28  
29  
30  
31  
32  
33  
34  
35  
36  
37  
38  
39  
40  
41  
42  
43  
44  
45  
46  
47  
48  
49  
50  
51  
52  
53  
54  
55  
56  
57  
58  
59  
60

## 48 **Introduction**

49 In pediatric research, enrollment of child subjects generally requires parental  
50 permission.<sup>1</sup> Adequate parental understanding of trial information is one of the keys to the  
51 ethical conduct of pediatric research because informed parents can act, as proxy decision  
52 makers, in their child's best interests and protect their child from assuming unreasonable risks.<sup>2</sup>  
53 Despite increasing ethical and regulatory scrutiny, deficiencies still exist in parental  
54 understanding; some parents have consented to research unaware of the experimental nature of  
55 research and the risks involved, or even the fact that they have consented to research on behalf  
56 of their child.<sup>3-7</sup> This is of ethical concern because inadequate parental understanding could  
57 jeopardize the safety and interest of a child subject and render him/her even more vulnerable.

58 An informed consent form (ICF) serves as a mandatory document for disclosure of  
59 research information to the subjects and/or their surrogate decision makers. Although the form  
60 alone may not be sufficient to achieve a proper, valid consent, it can and do serve multiple  
61 purposes in clinical trials, including the assurance of complete disclosure of information and  
62 enhancement of participants' comprehension.<sup>8</sup> In theoretical ideal, an ICF given to parents in  
63 pediatric research should be complete, concise, and understandable so that it would enable  
64 them to come to an informed decision in regard to their child's participation in a study.<sup>9</sup> In  
65 reality, empirical observations reveal a number of lengthy, detailed, and complicated ICFs  
66 which are unlikely to be read and understood by general laypersons.<sup>10-12</sup> Most ICF templates

1  
2  
3  
4 67 still seem to require a high level of reading comprehension.<sup>13</sup> The written language in quite a  
5  
6  
7 68 few ICFs stems from a desire to provide legal protection to investigators and sponsors rather  
8  
9  
10 69 than one designed to inform participants/surrogates for rational decision making.<sup>14</sup> At present,  
11  
12  
13 70 there is wide agreement that informed consent (including parental permission) requires more  
14  
15  
16 71 than a signature on a form: efforts should be put to promote understanding of consent  
17  
18  
19 72 information.<sup>15</sup>

22 73 The Strategic Initiative for Developing Capacity in Ethical Review (SIDCER) has  
23  
24  
25 74 recently proposed the ‘enhanced ICF development’ methodology, named ‘SIDCER ICF’, in  
26  
27  
28 75 response to the need for making an ICF complete, concise and understandable.<sup>16</sup> The SIDCER  
29  
30  
31 76 ICF methodology has been tested in real informed consent settings involving several clinical  
32  
33  
34 77 trials and it has been shown to be effective in improving participants’ understanding.<sup>17</sup> It is  
35  
36  
37 78 compelling to extend the application of the SIDCER ICF methodology to clinical research  
38  
39  
40 79 requiring proxy consent. The present study was, thus, designed to test the applicability and  
41  
42  
43 80 effectiveness of the SIDCER ICF in pediatric research requiring parental consent.  
44  
45  
46  
47  
48  
49  
50  
51  
52  
53  
54  
55  
56  
57  
58  
59  
60



## 81 **Materials and Methods**

82 This randomized-controlled study compared the effectiveness of two different ICFs –  
83 the SIDCER ICF and the conventional ICF (1:1) – on parental understanding of research-  
84 related information. The study protocol and related documents obtained ethical approval from  
85 the Institutional Review Board of Royal Thai Army Medical Department.

### 86 *Study participants*

87 Parents of children with transfusion-dependent thalassemia were recruited at the  
88 Pediatric Outpatients Department, Phramongkutklo Hospital, Bangkok, Thailand. They  
89 were invited to read either the SIDCER ICF or the conventional ICF (by random assignment)  
90 for possible enrollment of their child in a drug trial<sup>18</sup>; any refusal to read an ICF given was  
91 respected. This ICF study planned to enroll 210 parents (with 105 parents in each arm), based  
92 on an *a priori* estimate to detect the hypothesized effect size of 20% difference between two  
93 independent proportions of the primary endpoint ( $p_1 = 0.8$  and  $p_2 = 0.6$ ), with the precision and  
94 confidence level of 95%, 80% power and allocation ratio of 1, with a continuity correction.

### 95 *Study interventions*

96 The effectiveness of two different ICF interventions on parental understanding were  
97 compared: one was the original, standard ICF of the pediatric drug trial (in Thai) and another  
98 was the enhanced (SIDCER) ICF of the trial (in Thai). The former comprising six pages with  
99 2,065 words was considered as the conventional ICF; trial-related information was described

1  
2  
3  
4 100 using text in standard sequences. The latter comprising four pages with 1,644 words was  
5  
6  
7 101 developed according to the SIDCER ICF principles and template, comprehensively described  
8  
9  
10 102 elsewhere.<sup>15</sup> The SIDCER ICF contained complete and concise information of the drug trial in  
11  
12  
13 103 an enhanced format using summary boxes, highlights, and illustrations, when appropriate.

#### 16 104 *Study outcomes*

19 105 Parental understanding of essential research-related information was measured using  
20  
21  
22 106 the questionnaire (in Thai). It consisted of 24 scenario-based questions, aimed at assessing  
23  
24  
25 107 parental understanding of 24 required elements of the ICF content: five elements on general  
26  
27  
28 108 aspects, four elements on right aspects, eight elements on scientific aspects, and seven elements  
29  
30  
31 109 on ethical aspects. Of three possible answers in each question, there was only one correct  
32  
33  
34 110 answer, counting as a score of 1, making the total score 24. The primary endpoint was the  
35  
36  
37 111 proportion of parents obtaining the total score of more than 80% ( $\geq 20/24$ ). The secondary  
38  
39  
40 112 endpoints were the total score, the score of each categorical aspect, and time spent reading a  
41  
42  
43 113 given ICF and completing the questionnaire.

#### 46 114 *Study procedure*

49 115 Simple randomization was applied, and a randomization code was generated and  
50  
51  
52 116 packed in an opaque sealed envelope before subject enrollment to this ICF study. Eligible  
53  
54  
55 117 parents were randomly assigned to read either the SIDCER ICF or the conventional ICF. After  
56  
57  
58 118 that, the questionnaire was distributed. The parents could keep and read the ICF while  
59  
60

1  
2  
3  
4 119 completing the questionnaire, but they could not ask any questions during this process. Time  
5  
6  
7 120 spent reading the given ICF and completing the questionnaire was recorded and this was the  
8  
9  
10 121 end of the ICF study. The informed consent process continued for the clinical trial for both  
11  
12  
13 122 groups in the same manner, that is, informed consent discussion with the parents was conducted  
14  
15  
16 123 and any inaccurate understanding of trial information was explained prior to the parents'  
17  
18  
19 124 decision whether or not to sign consent for their child's participation in a pediatric drug trial.  
20  
21

### 22 125 *Data analysis*

23  
24  
25 126 Descriptive statistics were used to describe the basic features of the data in this study.  
26  
27  
28 127 Dichotomous variables were compared using  $\chi^2$  test or Fisher's exact test, as appropriate, and  
29  
30  
31 128 continuous variables were compared using nonparametric statistics (*i.e.*, the Wilcoxon rank-  
32  
33  
34 129 sum test). The proportion of the parents in the SIDCER ICF group who achieved the outcome  
35  
36  
37 130 divided by that of the conventional ICF group was presented using the term 'relative risk (RR)'.  
38  
39  
40 131 Subgroup analysis was done to determine the impact of gender, age and education on the  
41  
42  
43 132 primary endpoint. Multivariable logistic regression analysis was performed to obtain odds ratio  
44  
45  
46 133 (OR), a measure of association between demographic variables and the primary outcome. All  
47  
48  
49 134 statistical analysis was executed using IBM SPSS Statistics for Windows, Version 22.0, with  
50  
51  
52 135 a *p* value of less than 0.05 considered to indicate statistical significance.  
53  
54  
55  
56  
57  
58  
59  
60

## 136 **Results**

137 Two hundred and ten parents of thalassemia children were enrolled between  
138 September 2015 and September 2016 and equally assigned to the SIDCER ICF group ( $n = 105$ )  
139 and the conventional ICF group ( $n = 105$ ). The mean age of 210 enrolled parents was 35.6  
140 ( $\pm 3.1$ ) years; 72.9% were female, and 61.0% had education at a bachelor degree or higher  
141 (Table 1).

142 The primary endpoint was achieved by 42.9% and 27.6% of the parents in the SIDCER  
143 ICF group and the conventional ICF group, respectively (RR = 1.552, 95%CI = 1.061 to 2.270,  
144  $p = 0.021$ ) (Fig. 1). The superiority of the SIDCER ICF over the conventional ICF in improving  
145 parental understanding was seen particularly among those aged more than 35 years and those  
146 whose education was at a bachelor degree or higher (RR = 1.986, 95%CI = 1.193 to 3.305,  $p =$   
147  $0.006$ ; RR = 1.870, 95%CI = 1.234 to 2.834,  $p = 0.003$ , respectively) (Fig. 1). The multivariable  
148 analysis demonstrated that female gender and education at a bachelor degree or higher were  
149 independently associated with higher attainment of the primary endpoint (OR = 2.213, 95%CI  
150 = 1.067 to 4.591,  $p = 0.033$ ; OR = 2.052, 95%CI = 1.093 to 3.852,  $p = 0.025$ ), whereas age of  
151 the parents was not (OR = 1.008, 95%CI = 0.985 to 1.031,  $p = 0.485$ ).

152 The values of the secondary endpoints of this study are presented in Table 2. The  
153 parents in the SIDCER ICF group obtained higher total scores in less time spent when  
154 compared to the conventional ICF group (total score: 19 vs. 17,  $p = 0.001$ ; time spent reading

1  
2  
3  
4 155 an ICF: 20 min vs. 30 min,  $p < 0.001$ ). Proportions of the parents who correctly answered each  
5  
6  
7 156 element of the ICF content were compared between the two groups. The SIDCER ICF was  
8  
9  
10 157 found to be superior to the conventional ICF in improving parental understanding on five  
11  
12  
13 158 elements: who can access the data, right to receive new information, identification of  
14  
15  
16 159 experimental procedures, alternative course of treatment, and number of subjects required  
17  
18  
19 160 (Table 3). The element that was least understood by the parents in both groups was trial  
20  
21  
22 161 treatment and random assignment; only 66 (out of 210) parents (31.4%) answered this element  
23  
24  
25 162 correctly.  
26  
27  
28  
29  
30  
31  
32  
33  
34  
35  
36  
37  
38  
39  
40  
41  
42  
43  
44  
45  
46  
47  
48  
49  
50  
51  
52  
53  
54  
55  
56  
57  
58  
59  
60

## 163 Discussion

164 The present study demonstrated that the understanding level of trial information was  
165 significantly greater among parents who read the SIDCER ICF, when compared to those who  
166 read the conventional ICF. This indicates the applicability and effectiveness of the SIDCER  
167 ICF methodology in improving parental understanding of trial information in pediatric research  
168 requiring parental permission. The overall results of this study are consistent with three  
169 previous, independent informed consent studies that exhibited the improvement of participants'  
170 understanding by the SIDCER ICF.<sup>17,19,20</sup> In line with a recent integrative review on informed  
171 consent, enhanced ICFs associated with improved understanding are generally concise,  
172 context-specific, and simple, with increased processability (using summary boxes, highlights,  
173 and illustrations, when appropriate) to be more accessible and easily understood by readers.<sup>21</sup>  
174 All these characteristics make the SIDCER ICFs more readable and comprehensible, as  
175 consistently demonstrated in multiple studies.<sup>17,19,20</sup>

176 Two factors – education and gender of the parents – were identified to be an  
177 independent predictor of parental understanding levels of trial information in this study. Based  
178 on empirical observation, higher educational background is commonly found to be a major  
179 determinant of a greater understanding of information.<sup>22,23</sup> Researchers and ethics committee  
180 members should, thus, pay particular attention to the adequacy of understanding when  
181 proposed research involves participants or parents with a limited academic background, that is,

1  
2  
3  
4 182 the language used in the ICF must suit the individual's level of understanding. In addition, the  
5  
6  
7 183 present study identified another feature associated with understanding levels of trial  
8  
9  
10 184 information; female parents obtained optimal comprehension of trial information in a higher  
11  
12  
13 185 proportion than male parents did. Although it was unclear to us why female parents did better  
14  
15  
16 186 than male parents, one hypothesis to explain this observation is that women in general might  
17  
18  
19 187 be more information-seeking and tended to read the ICF more thoroughly than men. Female  
20  
21  
22 188 parents might have had more concern about their child's participation in research or might have  
23  
24  
25 189 taken more responsibility of the child's health care than did male parents, so they were more  
26  
27  
28 190 likely to read the ICF and contemplate the information more seriously.<sup>24</sup> However, a relatively  
29  
30  
31 191 few male parents in this study might not be a suitable representative of their group.

32  
33  
34 192 Close examination of the data revealed that the SIDCER ICF was superior to the  
35  
36  
37 193 conventional ICF in increasing the parental understanding of trial information in five elements.  
38  
39  
40 194 First, 'who can access the data'; it is important that the parents should understand the limit of  
41  
42  
43 195 confidentiality of their child's health data, so they would not incorrectly assume their child's  
44  
45  
46 196 health information to be fully kept confidential. This is due to the fact that some authority  
47  
48  
49 197 persons (*e.g.*, the monitors or the regulatory authorities) may be granted direct access to the  
50  
51  
52 198 subject's original medical records as required by regulations. Second, 'right to receive new  
53  
54  
55 199 information'; this element emphasized the nature of informed consent as an ongoing,  
56  
57  
58 200 interactive process. The parents should know that informed consent does not end when they  
59  
60

1  
2  
3  
4 201 sign the consent form; rather, they would still be kept informed of any new, relevant  
5  
6  
7 202 information that may become available and affect their decision during the course of the trial.  
8  
9  
10 203 Third, ‘identification of experimental procedures’; this element could help parents distinguish  
11  
12  
13 204 the procedures that are experimental in the trial from those used in routine care and recognize  
14  
15  
16 205 that research is not the same as standard care.<sup>25</sup> The additional risks derived from experimental  
17  
18  
19 206 procedures should be understood and accepted by the parents before they let their child  
20  
21  
22 207 participate in a trial. Fourth, ‘alternative course of treatment’; this element provided  
23  
24  
25 208 information about other options that the child would have had if his/her parents decided not to  
26  
27  
28 209 let him/her participate in the study. Understanding of this element would ensure the  
29  
30  
31 210 voluntariness of trial participation. The parents should recognize that trial participation is not  
32  
33  
34 211 the only option available for their child. Fifth, ‘number of subjects required’; this element  
35  
36  
37 212 informed parents about the approximate number of children that the trial would recruit. This  
38  
39  
40 213 information could be material to decision making for trial participation in some settings; for  
41  
42  
43 214 example, some parents may be reluctant to let their child participate in a trial involving a small  
44  
45  
46 215 number of children, while they may feel more comfortable when a trial involves a large number  
47  
48  
49 216 of subjects with the same condition as their child.

50  
51  
52 217 The element that was least understood by the parents in both groups was ‘trial  
53  
54  
55 218 treatment and random assignment’. This finding supports lines of the evidence demonstrating  
56  
57  
58 219 that there is the apparent universality of a limited understanding on the aspect of random  
59  
60



1  
2  
3  
4 220 allocation of the intervention in clinical trials.<sup>26-27</sup> Despite an attempt with increased  
5  
6  
7 221 processability in the SIDCER ICF to aid in description on the concept of randomization (using  
8  
9  
10 222 illustrations and highlights), a large proportion of the parents (63.8%) still did not understand  
11  
12  
13 223 it accurately. This emphasizes the need of increased attention in particular during informed  
14  
15  
16 224 consent discussion to ensure adequate understanding of this concept among individuals who  
17  
18  
19 225 consent to a trial.<sup>28</sup> A combination of the SIDCER ICF methodology with other means (*e.g.*,  
20  
21  
22 226 an integrated cognitive approach<sup>29</sup>) may enhance parental understanding of consent  
23  
24  
25 227 information in pediatric research.

28 228         Although the overall results demonstrated that the SIDCER ICF was proven superior  
29  
30  
31 229 to the conventional ICF, the degree of parental understanding remained unsatisfactory.  
32  
33  
34 230 Deficiencies in understanding were still prevalent even among those who read the SIDCER  
35  
36  
37 231 ICF. Truong *et al* observed that parents of children with poor prognoses seem to understand  
38  
39  
40 232 trial information better than do parents of children with more favorable prognoses.<sup>30</sup> Continued  
41  
42  
43 233 consideration of the normative and practical aspects of informed consent is needed in an  
44  
45  
46 234 attempt to facilitate understanding among parents who act as proxies for their child's  
47  
48  
49 235 participation in research.<sup>31,32</sup> It may be worthwhile to consider using more graphics or  
50  
51  
52 236 pictographs to enhance visualization of complex information,<sup>33</sup> and further research may be  
53  
54  
55 237 required to determine the effectiveness of such additional means in this group of population. A  
56  
57  
58 238 dialogue between the investigator (or a person designated by the investigator) and the parents  
59  
60

1  
2  
3  
4 239 are still indispensable, while complimentary methods of delivering trial-related information  
5  
6  
7 240 (*e.g.*, a multimedia video and website<sup>29</sup>) may be warranted in some studies. Furthermore,  
8  
9  
10 241 formal evaluation of parental understanding during the process of informed consent may be  
11  
12  
13 242 necessary in pediatric research that poses relatively high risks, with little or no potential direct  
14  
15  
16 243 benefit, to child subjects.<sup>34,35</sup> Accordingly, any inaccuracy of parental understanding could be  
17  
18  
19 244 rectified to ascertain the validity of parental consent obtained in such research.  
20  
21

22 245 Of note, this study was confined to parental understanding of ICFs while children's  
23  
24  
25 246 understanding of an assent form was not studied. It is also possible that the SIDCER ICF  
26  
27  
28 247 methodology may be modified and used to improve the quality of assent forms for pediatric  
29  
30  
31 248 populations. As such, further ICF studies involving pediatric populations are warranted.  
32  
33

34 249 In conclusion, the present study demonstrated that the SIDCER ICF methodology was  
35  
36  
37 250 applicable to pediatric research requiring parental consent and effective in improving parental  
38  
39  
40 251 understanding of trial information. However, deficiencies in understanding were still prevalent  
41  
42  
43 252 among the parents of child subjects, at least, in this setting, suggesting that further research is  
44  
45  
46 253 required to improve parental understanding in pediatric drug trials.  
47  
48  
49  
50  
51  
52  
53  
54  
55  
56  
57  
58  
59  
60

1  
2  
3  
4 254 **Acknowledgements:** We thank Dr. Piyarat Simthamnimit and Dr. Chalinee Monsereenusorn,  
5  
6  
7 255 the investigators of the pediatric drug trial, for their collaboration. Thanks are extended to Ms.  
8  
9  
10 256 Chotimane Kaewserm and her colleagues for their assistance in reviewing the SIDCER ICF  
11  
12  
13 257 from laypersons' perspectives.

14  
15  
16 258 **Contributor:** The study was designed by Nut Koonrunksesomboon and Juntra Karbwang, and  
17  
18  
19 259 conducted by Chanchai Traivaree and Charnunnut Tiyapsane. Data analysis was done by Nut  
20  
21  
22 260 Koonrunksesomboon. The manuscript was written by Nut Koonrunksesomboon and revised  
23  
24  
25 261 by Juntra Karbwang, with contributions from all authors. All authors approved the final version  
26  
27  
28 262 submitted.

29  
30  
31 263 **Funding:** This study was partially supported by Phramongkutklao Hospital and  
32  
33  
34 264 Phramongkutklao College of Medicine, Chiang Mai University, and TDR, the Special  
35  
36  
37 265 Programme for Research and Training in Tropical Diseases, co-sponsored by UNICEF, UNDP,  
38  
39  
40 266 the World Bank, and WHO through the Forum for Ethical Review Committees in the Asian  
41  
42  
43 267 and Western Pacific region (FERCAP). The funding sources had no role in the analysis and  
44  
45  
46 268 interpretation of the data; preparation, review or approval of the manuscript; and decision to  
47  
48  
49 269 submit this manuscript for publication.

50  
51  
52 270 **Competing interests:** We have read and understood BMJ policy on declaration of interests  
53  
54  
55 271 and declare that we have no competing interests.

56  
57  
58 272 **Ethics approval:** This study was approved by ...  
59  
60

1  
2  
3  
4 273 **Data sharing statement:** The participants did not give consent for data to be shared beyond  
5  
6  
7 274 the research team.  
8  
9  
10  
11  
12  
13  
14  
15  
16  
17  
18  
19  
20  
21  
22  
23  
24  
25  
26  
27  
28  
29  
30  
31  
32  
33  
34  
35  
36  
37  
38  
39  
40  
41  
42  
43  
44  
45  
46  
47  
48  
49  
50  
51  
52  
53  
54  
55  
56  
57  
58  
59  
60

For peer review only

1  
2  
3  
4 275 **References**  
5  
6

- 7 276 1. Roth-Cline M, Nelson RM. Parental permission and child assent in research on children.  
8  
9  
10 277 Yale J Biol Med 2013;86:291-301.  
11  
12  
13 278 2. Leibson T, Koren G. Informed consent in pediatric research. Paediatr Drugs 2015;17:5-11.  
14  
15  
16 279 3. Franck LS, Winter I, Oulton K. The quality of parental consent for research with children:  
17  
18  
19 280 a prospective repeated measure self-report survey. Int J Nurs Stud 2007;44:525-533.  
20  
21  
22 281 4. Pace C, Talisuna A, Wendler D, et al. Quality of parental consent in a Ugandan malaria  
23  
24  
25 282 study. Am J Public Health 2005;95:1184-1189.  
26  
27  
28 283 5. Chappuy H, Baruchel A, Leverger G, et al. Parental comprehension and satisfaction in  
29  
30  
31 284 informed consent in paediatric clinical trials: a prospective study on childhood leukaemia.  
32  
33  
34 285 Arch Dis Child 2010;95:800-804.  
35  
36  
37 286 6. Chappuy H, Doz F, Blanche S, et al. Parental consent in paediatric clinical research. Arch  
38  
39  
40 287 Dis Child 2006;91:112-116.  
41  
42  
43 288 7. Chappuy H, Bouazza N, Minard-Colin V, et al. Parental comprehension of the  
44  
45  
46 289 benefits/risks of first-line randomised clinical trials in children with solid tumours: a two-  
47  
48  
49 290 stage cross-sectional interview study. BMJ Open 2013;3:e002733.  
50  
51  
52 291 8. Sugarman J. Examining provisions related to consent in the revised Common Rule. Am J  
53  
54  
55 292 Bioeth 2017;17:22-26.  
56  
57  
58  
59  
60

- 1  
2  
3  
4 293 9. Hazen RA, Drotar D, Kodish E. The role of the consent document in informed consent for  
5  
6  
7 294 pediatric leukemia trials. *Contemp Clin Trials* 2007;28:401-408.  
8  
9  
10 295 10. Berger O, Grønberg BH, Sand K, et al. The length of consent documents in oncological  
11  
12  
13 296 trials is doubled in twenty years. *Ann Oncol* 2009;20:379-385.  
14  
15  
16 297 11. Kass NE, Chaisson L, Taylor HA, Lohse J. Length and complexity of US and international  
17  
18  
19 298 HIV consent forms from federal HIV network trials. *J Gen Intern Med* 2011;26:1324-1328.  
20  
21  
22 299 12. Wen G, Liu X, Huang L, et al. Readability and content assessment of informed consent  
23  
24  
25 300 forms for phase II-IV clinical trials in China. *PLoS One* 2016;11:e0164251.  
26  
27  
28 301 13. Villafranca A, Kereliuk S, Hamlin C, et al. The appropriateness of language found in  
29  
30  
31 302 research consent form templates: a computational linguistic analysis. *PLoS One*  
32  
33  
34 303 2017;12:30169143.  
35  
36  
37 304 14. Bhutta ZA. Beyond informed consent. *Bull World Health Organ* 2004;82:771-777.  
38  
39  
40 305 15. Nishimura A, Carey J, Erwin PJ, et al. Improving understanding in the research informed  
41  
42  
43 306 consent process: a systematic review of 54 interventions tested in randomized control trials.  
44  
45  
46 307 *BMC Med Ethics* 2013;14:28.  
47  
48  
49 308 16. Koonrunsesomboon N, Laothavorn J, Chokevivat V, et al. SIDCER informed consent  
50  
51  
52 309 form: principles and a developmental guideline. *Indian J Med Ethics* 2016;1:83-86.  
53  
54  
55 310 17. Koonrunsesomboon N, Tharavanij T, Phiphatpatthamaamphan K, et al. Improved  
56  
57  
58 311 participants' understanding of research information in real settings using the SIDCER  
59  
60

- 1  
2  
3  
4 312 informed consent form: a randomized-controlled informed consent study nested with eight  
5  
6  
7 313 clinical trials. *Eur J Clin Pharmacol* 2017;73:141-149.  
8  
9  
10 314 18. Simthamnimit P, Traivaree C, Monsereenusorn C, Torcharus K. Efficacy of furosemide for  
11  
12  
13 315 prevention of volume overload in children with transfusion-dependent thalassemia at  
14  
15  
16 316 Phramongkutklao Hospital. *Royal Thai Army Med J* 2015;68:81-82.  
17  
18  
19 317 19. Koonrunsesomboon N, Teekachunhatean S, Hanprasertpong N, et al. Improved  
20  
21  
22 318 participants' understanding in a healthy volunteer study using the SIDCER informed  
23  
24  
25 319 consent form: a randomized-controlled study. *Eur J Clin Pharmacol* 2016;72:413-421.  
26  
27  
28 320 20. Koonrunsesomboon N, Traivaree C, Chamnanvanakij S, et al. Improved pregnant  
29  
30  
31 321 women's understanding of research information by an enhanced informed consent form: a  
32  
33  
34 322 randomised controlled study nested in neonatal research. *Arch Dis Child Fetal Neonatal Ed*  
35  
36  
37 323 2018;103:F403-F407.  
38  
39  
40 324 21. Foe G, Larson EL. Reading level and comprehension of research consent forms: an  
41  
42  
43 325 integrative review. *J Empir Res Hum Res Ethics* 2016;11:31-46.  
44  
45  
46 326 22. Tam NT, Huy NT, Thoa le TB, et al. Participants' understanding of informed consent in  
47  
48  
49 327 clinical trials over three decades: systematic review and meta-analysis. *Bull World Health*  
50  
51  
52 328 *Organ* 2015;93:186H-198H.  
53  
54  
55 329 23. Flory J, Emanuel E. Interventions to improve research participants' understanding in  
56  
57  
58 330 informed consent for research: a systematic review. *JAMA* 2004;292:1593-1601.  
59  
60

- 1  
2  
3  
4 331 24. Knepp MM. Personality, sex of participant, and face-to-face interaction affect reading of  
5  
6  
7 332 informed consent forms. *Psychol Rep* 2014;114:297-313.  
8  
9  
10 333 25. Henderson GE, Churchill LR, Davis AM, et al. Clinical trials and medical care: defining  
11  
12  
13 334 the therapeutic misconception. *PLoS Med* 2007;4:e324.  
14  
15  
16 335 26. Kupst MJ, Patenaude AF, Walco GA, Sterling C Clinical trials in pediatric cancer: parental  
17  
18  
19 336 perspectives on informed consent. *J Pediatr Hematol Oncol* 2003;25:787-790.  
20  
21  
22 337 27. Kodish E, Eder M, Noll RB, et al. Communication of randomization in childhood leukemia  
23  
24  
25 338 trials. *JAMA* 2004;291:470-475.  
26  
27  
28 339 28. Carvalho AA, Costa LR. Mothers' perceptions of their child's enrollment in a randomized  
29  
30  
31 340 clinical trial: poor understanding, vulnerability and contradictory feelings. *BMC Med*  
32  
33  
34 341 *Ethics* 2013;14:52.  
35  
36  
37 342 29. Antal H, Bunnell HT, McCahan SM, et al. A cognitive approach for design of a multimedia  
38  
39  
40 343 informed consent video and website in pediatric research. *J Biomed Inform* 2017;66:248-  
41  
42  
43 344 258.  
44  
45  
46 345 30. Truong TH, Weeks JC, Cook EF, Joffe S. Outcomes of informed consent among parents  
47  
48  
49 346 of children in cancer clinical trials. *Pediatr Blood Cancer* 2011;57:998-1004.  
50  
51  
52 347 31. Shilling V, Young B. How do parents experience being asked to enter a child in a  
53  
54  
55 348 randomised controlled trial? *BMC Med Ethics* 2009;10:1.  
56  
57  
58  
59  
60



- 1  
2  
3  
4 349 32. Alahmad G. Informed consent in pediatric oncology: a systematic review of qualitative  
5  
6  
7 350 literature. *Cancer Control* 2018;25:1073274818773720.  
8  
9  
10 351 33. Tait AR, Voepel-Lewis T, Zikmund-Fisher BJ, Fagerlin A. The effect of format on parents'  
11  
12  
13 352 understanding of the risks and benefits of clinical research: a comparison between text,  
14  
15  
16 353 tables, and graphics. *J Health Commun* 2010;15:487-501.  
17  
18  
19 354 34. Wendler D. How to enroll participants in research ethically. *JAMA* 2011;305:1587-1588.  
20  
21  
22 355 35. Bromwich D, Rid A. Can informed consent to research be adapted to risk? *J Med Ethics*  
23  
24  
25 356 2015;41:521-528.  
26  
27  
28  
29  
30  
31  
32  
33  
34  
35  
36  
37  
38  
39  
40  
41  
42  
43  
44  
45  
46  
47  
48  
49  
50  
51  
52  
53  
54  
55  
56  
57  
58  
59  
60

357 **Table 1** Demographic data of the parents ( $n = 210$ )

|                          | <b>SIDCER ICF</b><br>( $n = 105$ ) | <b>Conventional ICF</b><br>( $n = 105$ ) |
|--------------------------|------------------------------------|------------------------------------------|
| <b>Gender</b>            |                                    |                                          |
| Male                     | 30 (28.6%)                         | 27 (25.7%)                               |
| Female                   | 75 (71.4%)                         | 78 (74.3%)                               |
| <b>Age</b>               |                                    |                                          |
| <35 years                | 58 (55.2%)                         | 49 (46.7%)                               |
| ≥35 years                | 47 (44.8%)                         | 56 (53.3%)                               |
| <b>Education</b>         |                                    |                                          |
| High school or below     | 49 (46.7%)                         | 33 (31.4%)                               |
| Bachelor degree or above | 56 (53.3%)                         | 72 (68.6%)                               |

358 Data represent the number of parents. ICF, informed consent form.

359

1  
2  
3  
4 **Table 2** The total score, the score in each categorical aspect of the ICF content, and time spent  
5  
6  
7 361 reading a given ICF and completing the questionnaire  
8

|                                                      | <b>SIDCER ICF</b><br>( <i>n</i> = 105) | <b>Conventional ICF</b><br>( <i>n</i> = 105) | <b><i>p</i></b>  |
|------------------------------------------------------|----------------------------------------|----------------------------------------------|------------------|
| Total score (out of 24)                              | 19 (16 to 21)                          | 17 (12 to 20)                                | <b>0.001</b>     |
| - Score in the general aspects (out of 5)            | 4 (3 to 5)                             | 4 (3 to 5)                                   | 0.080            |
| - Score in the rights aspects (out of 4)             | 4 (3 to 4)                             | 4 (2 to 4)                                   | 0.502            |
| - Score in the scientific aspects (out of 8)         | 5 (4 to 7)                             | 5 (3 to 6)                                   | <b>&lt;0.001</b> |
| - Score in the ethical aspects (out of 7)            | 5 (4 to 7)                             | 5 (3 to 6)                                   | <b>0.015</b>     |
| Time spent reading a given ICF (minutes)             | 20 (15 to 30)                          | 30 (20 to 30)                                | <b>&lt;0.001</b> |
| Time spent completing the questionnaire<br>(minutes) | 20 (15 to 30)                          | 30 (20 to 35)                                | <b>&lt;0.001</b> |

25 362 Data represent median (interquartile range,  $Q_1$  to  $Q_3$ ).

26  
27 363  
28  
29  
30  
31  
32  
33  
34  
35  
36  
37  
38  
39  
40  
41  
42  
43  
44  
45  
46  
47  
48  
49  
50  
51  
52  
53  
54  
55  
56  
57  
58  
59  
60

364 **Table 3** Parental understanding in each element of the ICF content

|                                               | SIDCER ICF<br>(n = 105) | Conventional<br>ICF (n = 105) | Relative Risk (95%CI) | p                |
|-----------------------------------------------|-------------------------|-------------------------------|-----------------------|------------------|
| <b>General aspects</b>                        |                         |                               |                       |                  |
| 1. Recognition that this is research          | 80 (76.2%)              | 78 (74.3%)                    | 1.026 (0.878-1.198)   | 0.749            |
| 2. Subjects' responsibility                   | 85 (81.0%)              | 84 (80.0%)                    | 1.012 (0.886-1.156)   | 0.862            |
| 3. Confidentiality of records                 | 74 (70.5%)              | 64 (61.0%)                    | 1.156 (0.950-1.408)   | 0.146            |
| 4. Who can access the data                    | 82 (78.1%)              | 68 (64.8%)                    | 1.206 (1.014-1.435)   | <b>0.032</b>     |
| 5. Research contact persons                   | 98 (93.3%)              | 96 (91.4%)                    | 1.021 (0.944-1.103)   | 0.603            |
| <b>Right aspects</b>                          |                         |                               |                       |                  |
| 6. Right to refuse                            | 76 (72.4%)              | 87 (82.9%)                    | 0.874 (0.754-1.012)   | 0.069            |
| 7. Right to withdraw                          | 95 (90.5%)              | 87 (82.9%)                    | 1.092 (0.981-1.215)   | 0.104            |
| 8. Consequences of withdrawal                 | 96 (91.4%)              | 87 (82.9%)                    | 1.103 (0.994-1.225)   | 0.064            |
| 9. Right to receive new information           | 91 (86.7%)              | 78 (74.3%)                    | 1.167 (1.019-1.336)   | <b>0.024</b>     |
| <b>Scientific aspects</b>                     |                         |                               |                       |                  |
| 10. Eligibility of the subject                | 81 (77.1%)              | 72 (68.6%)                    | 1.125 (0.953-1.328)   | 0.163            |
| 11. Number of subjects required               | 87 (82.9%)              | 43 (41.0%)                    | 2.023 (1.583-2.587)   | <b>&lt;0.001</b> |
| 12. Purpose of the study                      | 80 (76.2%)              | 75 (71.4%)                    | 1.067 (0.908-1.254)   | 0.433            |
| 13. Trial treatment and random assignment     | 38 (36.2%)              | 28 (26.7%)                    | 1.357 (0.904-2.038)   | 0.137            |
| 14. Trial procedures                          | 65 (61.9%)              | 52 (49.5%)                    | 1.250 (0.979-1.596)   | 0.071            |
| 15. Identification of experimental procedures | 80 (76.2%)              | 66 (62.9%)                    | 1.212 (1.011-1.454)   | <b>0.036</b>     |
| 16. Duration of the subject's participation   | 88 (83.8%)              | 79 (75.2%)                    | 1.114 (0.970-1.279)   | 0.124            |
| 17. Storage and reuse of human materials      | 60 (57.1%)              | 57 (54.3%)                    | 1.053 (0.827-1.340)   | 0.677            |
| <b>Ethical aspects</b>                        |                         |                               |                       |                  |
| 18. Alternative course of treatment           | 94 (89.5%)              | 82 (78.1%)                    | 1.146 (1.016-1.293)   | <b>0.025</b>     |
| 19. Foreseeable risks                         | 70 (66.7%)              | 61 (58.1%)                    | 1.148 (0.929-1.418)   | 0.200            |
| 20. Expected direct/indirect benefits         | 52 (49.5%)              | 42 (40.0%)                    | 1.238 (0.914-1.677)   | 0.165            |
| 21. Post-trial benefits                       | 82 (78.1%)              | 72 (68.6%)                    | 1.139 (0.966-1.342)   | 0.119            |
| 22. Prorated payment for participation        | 91 (86.7%)              | 84 (80.0%)                    | 1.083 (0.959-1.223)   | 0.195            |
| 23. Anticipated expenses                      | 60 (57.1%)              | 53 (50.5%)                    | 1.132 (0.880-1.456)   | 0.333            |
| 24. Compensation for injury                   | 92 (87.6%)              | 83 (79.0%)                    | 1.108 (0.981-1.252)   | 0.096            |

365

1  
2  
3  
4  
5  
6  
7  
8  
9  
10  
11  
12  
13  
14  
15  
16  
17  
18  
19  
20  
21  
22  
23  
24  
25  
26  
27  
28  
29  
30  
31  
32  
33  
34  
35  
36  
37  
38  
39  
40  
41  
42  
43  
44  
45  
46  
47  
48  
49  
50  
51  
52  
53  
54  
55  
56  
57  
58  
59  
60

366 **Figure legends**

367 **Fig. 1** Proportions of the parents whose understanding score was more than 80% ( $\geq 20/24$ )

For peer review only

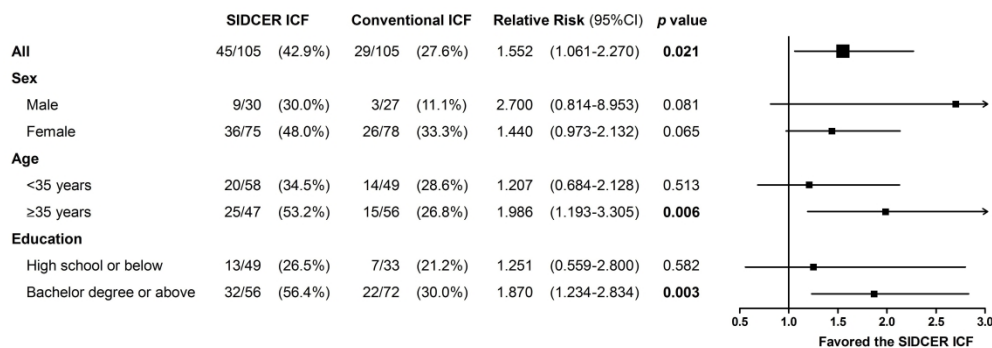

Fig. 1 Proportions of the parents whose understanding score was more than 80% ( $\geq 20/24$ )

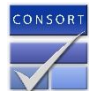

## CONSORT 2010 checklist of information to include when reporting a randomised trial\*

| Section/Topic                    | Item No | Checklist item                                                                                                                                                                              | Reported on page No |
|----------------------------------|---------|---------------------------------------------------------------------------------------------------------------------------------------------------------------------------------------------|---------------------|
| <b>Title and abstract</b>        |         |                                                                                                                                                                                             |                     |
|                                  | 1a      | Identification as a randomised trial in the title                                                                                                                                           | 1                   |
|                                  | 1b      | Structured summary of trial design, methods, results, and conclusions (for specific guidance see CONSORT for abstracts)                                                                     | 2-3                 |
| <b>Introduction</b>              |         |                                                                                                                                                                                             |                     |
| Background and objectives        | 2a      | Scientific background and explanation of rationale                                                                                                                                          | 5-6                 |
|                                  | 2b      | Specific objectives or hypotheses                                                                                                                                                           | 6                   |
| <b>Methods</b>                   |         |                                                                                                                                                                                             |                     |
| Trial design                     | 3a      | Description of trial design (such as parallel, factorial) including allocation ratio                                                                                                        | 7                   |
|                                  | 3b      | Important changes to methods after trial commencement (such as eligibility criteria), with reasons                                                                                          | n/a                 |
| Participants                     | 4a      | Eligibility criteria for participants                                                                                                                                                       | 7                   |
|                                  | 4b      | Settings and locations where the data were collected                                                                                                                                        | 7                   |
| Interventions                    | 5       | The interventions for each group with sufficient details to allow replication, including how and when they were actually administered                                                       | 7-8                 |
| Outcomes                         | 6a      | Completely defined pre-specified primary and secondary outcome measures, including how and when they were assessed                                                                          | 8                   |
|                                  | 6b      | Any changes to trial outcomes after the trial commenced, with reasons                                                                                                                       | n/a                 |
| Sample size                      | 7a      | How sample size was determined                                                                                                                                                              | 7                   |
|                                  | 7b      | When applicable, explanation of any interim analyses and stopping guidelines                                                                                                                | n/a                 |
| <b>Randomisation:</b>            |         |                                                                                                                                                                                             |                     |
| Sequence generation              | 8a      | Method used to generate the random allocation sequence                                                                                                                                      | 8                   |
|                                  | 8b      | Type of randomisation; details of any restriction (such as blocking and block size)                                                                                                         | 8                   |
| Allocation concealment mechanism | 9       | Mechanism used to implement the random allocation sequence (such as sequentially numbered containers), describing any steps taken to conceal the sequence until interventions were assigned | 8                   |
|                                  | 10      | Who generated the random allocation sequence, who enrolled participants, and who assigned participants to interventions                                                                     | 8                   |

|    |                                                      |     |                                                                                                                                                   |               |
|----|------------------------------------------------------|-----|---------------------------------------------------------------------------------------------------------------------------------------------------|---------------|
| 1  | Blinding                                             | 11a | If done, who was blinded after assignment to interventions (for example, participants, care providers, those assessing outcomes) and how          | n/a           |
| 2  |                                                      |     |                                                                                                                                                   |               |
| 3  |                                                      | 11b | If relevant, description of the similarity of interventions                                                                                       | n/a           |
| 4  | Statistical methods                                  | 12a | Statistical methods used to compare groups for primary and secondary outcomes                                                                     | 9             |
| 5  |                                                      | 12b | Methods for additional analyses, such as subgroup analyses and adjusted analyses                                                                  | 9             |
| 6  |                                                      |     |                                                                                                                                                   |               |
| 7  | <b>Results</b>                                       |     |                                                                                                                                                   |               |
| 8  | Participant flow (a diagram is strongly recommended) | 13a | For each group, the numbers of participants who were randomly assigned, received intended treatment, and were analysed for the primary outcome    | 10            |
| 9  |                                                      | 13b | For each group, losses and exclusions after randomisation, together with reasons                                                                  | n/a           |
| 10 | Recruitment                                          | 14a | Dates defining the periods of recruitment and follow-up                                                                                           | 10            |
| 11 |                                                      | 14b | Why the trial ended or was stopped                                                                                                                | n/a           |
| 12 | Baseline data                                        | 15  | A table showing baseline demographic and clinical characteristics for each group                                                                  | Table 1       |
| 13 | Numbers analysed                                     | 16  | For each group, number of participants (denominator) included in each analysis and whether the analysis was by original assigned groups           | 10            |
| 14 |                                                      |     |                                                                                                                                                   |               |
| 15 | Outcomes and estimation                              | 17a | For each primary and secondary outcome, results for each group, and the estimated effect size and its precision (such as 95% confidence interval) | 10-11, Fig. 1 |
| 16 |                                                      | 17b | For binary outcomes, presentation of both absolute and relative effect sizes is recommended                                                       | 10-11, Fig. 1 |
| 17 | Ancillary analyses                                   | 18  | Results of any other analyses performed, including subgroup analyses and adjusted analyses, distinguishing pre-specified from exploratory         | 10-11         |
| 18 |                                                      |     |                                                                                                                                                   |               |
| 19 | Harms                                                | 19  | All important harms or unintended effects in each group (for specific guidance see CONSORT for harms)                                             | n/a           |
| 20 |                                                      |     |                                                                                                                                                   |               |
| 21 | <b>Discussion</b>                                    |     |                                                                                                                                                   |               |
| 22 | Limitations                                          | 20  | Trial limitations, addressing sources of potential bias, imprecision, and, if relevant, multiplicity of analyses                                  | 12-16         |
| 23 | Generalisability                                     | 21  | Generalisability (external validity, applicability) of the trial findings                                                                         | 12-16         |
| 24 | Interpretation                                       | 22  | Interpretation consistent with results, balancing benefits and harms, and considering other relevant evidence                                     | 12-16         |
| 25 |                                                      |     |                                                                                                                                                   |               |
| 26 | <b>Other information</b>                             |     |                                                                                                                                                   |               |
| 27 | Registration                                         | 23  | Registration number and name of trial registry                                                                                                    | n/a           |
| 28 | Protocol                                             | 24  | Where the full trial protocol can be accessed, if available                                                                                       | n/a           |
| 29 | Funding                                              | 25  | Sources of funding and other support (such as supply of drugs), role of funders                                                                   | 17            |

n/a, not applicable



# BMJ Open

## Improved parental understanding by an enhanced informed consent form: a randomized controlled study nested in a pediatric drug trial

|                                 |                                                                                                                                                                                                                                                             |
|---------------------------------|-------------------------------------------------------------------------------------------------------------------------------------------------------------------------------------------------------------------------------------------------------------|
| Journal:                        | <i>BMJ Open</i>                                                                                                                                                                                                                                             |
| Manuscript ID                   | bmjopen-2019-029530.R1                                                                                                                                                                                                                                      |
| Article Type:                   | Original research                                                                                                                                                                                                                                           |
| Date Submitted by the Author:   | 26-Aug-2019                                                                                                                                                                                                                                                 |
| Complete List of Authors:       | Koonrunsesomboon, Nut; Chiang Mai University Faculty of Medicine Traivaree, Chanchai; Phramongkutklao College of Medicine Tiyaapsane, Charnunnut; Phramongkutklao College of Medicine Karbwang, Juntra; Institute of Tropical Medicine, product development |
| <b>Primary Subject Heading</b>: | Ethics                                                                                                                                                                                                                                                      |
| Secondary Subject Heading:      | Paediatrics                                                                                                                                                                                                                                                 |
| Keywords:                       | Informed consent, Parental consent, Consent forms, Pediatrics, Comprehension                                                                                                                                                                                |
|                                 |                                                                                                                                                                                                                                                             |

SCHOLARONE™  
Manuscripts

**TITLE PAGE**

**Title:** Improved parental understanding by an enhanced informed consent form: a randomized controlled study nested in a pediatric drug trial

**Author names and affiliations:** Nut Koonrunsesomboon<sup>1,2</sup>, Chanchai Traivaree<sup>3</sup>, Charnunnut Tiyapsane<sup>3</sup>, Juntra Karbwang<sup>4</sup>

<sup>1</sup>Department of Pharmacology, Faculty of Medicine, Chiang Mai University, Chiang Mai, Thailand.

<sup>2</sup>Musculoskeletal Science and Translational Research (MSTR), Chiang Mai University, Chiang Mai, Thailand.

<sup>3</sup>Department of Pediatrics, Phramongkutklo Hospital and Phramongkutklo College of Medicine, Bangkok, Thailand.

<sup>4</sup>Department of Clinical Product Development, Institute of Tropical Medicine, Nagasaki University, Nagasaki, Japan.

**Corresponding author:** Juntra Karbwang, M.D., Ph.D., Department of Clinical Product Development, Institute of Tropical Medicine, Nagasaki University, 1-12-4 Sakamoto, Nagasaki 852-8523, Japan, Tel: +81-95-819-7558, Fax: +81-95-819-7846, Email address: karbwangj@nagasaki-u.ac.jp or jkarbwang@yahoo.com

**Email address:** Nut Koonrunsesomboon: nkoonrung@gmail.com; Chanchai Traivaree: ctrivaree@yahoo.com; Charnunnut Tiyapsane: charnunnut332@gmail.com; Juntra Karbwang:

1  
2  
3  
4 20 jkarbwang@yahoo.com  
5  
6

7 21 **Key words:** Informed consent; Parental consent; Pediatrics; Consent forms; Comprehension.  
8  
9  
10  
11  
12  
13  
14  
15  
16  
17  
18  
19  
20  
21  
22  
23  
24  
25  
26  
27  
28  
29  
30  
31  
32  
33  
34  
35  
36  
37  
38  
39  
40  
41  
42  
43  
44  
45  
46  
47  
48  
49  
50  
51  
52  
53  
54  
55  
56  
57  
58  
59  
60

For peer review only

**Abstract**

*Objective:* This study was designed to evaluate the applicability and effectiveness of the enhanced informed consent form (ICF) methodology, proposed by the Strategic Initiative for Developing Capacity in Ethical Review (SIDCER), in pediatric research requiring parental consent. The objective of this study was to compare the parental understanding of information between the parents who read the SIDCER ICF and those who read the conventional ICF.

*Design:* A prospective, randomized-controlled design.

*Setting:* Pediatric Outpatients Department, Phramongkutklo Hospital, Thailand.

*Participants:* 210 parents of children with thalassemia (age =  $35.6 \pm 13.1$  years).

*Interventions:* The parents were randomly assigned to read either the SIDCER ICF ( $n = 105$ ) or the conventional ICF ( $n = 105$ ) of a pediatric drug trial.

*Primary and secondary outcome measures:* Parental understanding of trial information was determined using 24 scenario-based questions. The primary endpoint was the proportion of parents who obtained the understanding score of more than 80%, and the secondary endpoint was the total score.

*Results:* Forty-five parents (42.9%) in the SIDCER ICF group and 29 parents (27.6%) in the conventional ICF group achieved the primary endpoint (relative risk = 1.552, 95%CI = 1.061 to 2.270,  $p = 0.021$ ). The total score of the parents in the SIDCER ICF group was significantly higher than the conventional ICF group ( $18.07 \pm 3.71$  vs.  $15.98 \pm 4.56$ ,  $p = 0.001$ ).

1  
2  
3  
4 41 *Conclusions:* The SIDCER ICF was found to be superior to the conventional ICF in improving  
5  
6  
7 42 parental understanding of trial information.  
8  
9  
10  
11  
12  
13  
14  
15  
16  
17  
18  
19  
20  
21  
22  
23  
24  
25  
26  
27  
28  
29  
30  
31  
32  
33  
34  
35  
36  
37  
38  
39  
40  
41  
42  
43  
44  
45  
46  
47  
48  
49  
50  
51  
52  
53  
54  
55  
56  
57  
58  
59  
60

For peer review only

1  
2  
3  
4 43 **Strengths and limitations of the study**

- 5  
6  
7 44 • This study was a comparative, randomized-controlled study, in which the SIDCER ICF  
8  
9  
10 45 (study intervention) was directly compared to the conventional ICF (control) to  
11  
12  
13 46 establish superiority.
- 14  
15  
16 47 • This study was conducted on actual parents deciding whether or not to allow their child  
17  
18  
19 48 to participate in a pediatric drug trial.
- 20  
21  
22 49 • This study was confined to the parental understanding of an ICF while the child's  
23  
24  
25 50 understanding of an assent form was not studied.
- 26  
27  
28 51 • The findings were largely confined to research contexts in Thailand and may not  
29  
30  
31 52 account for other settings.  
32  
33  
34  
35  
36  
37  
38  
39  
40  
41  
42  
43  
44  
45  
46  
47  
48  
49  
50  
51  
52  
53  
54  
55  
56  
57  
58  
59  
60

## 53 Introduction

54 In pediatric research, enrollment of child subjects generally requires parental  
55 permission.<sup>1</sup> Adequate parental understanding of trial information is one of the keys to the  
56 ethical conduct of pediatric research because informed parents can act, as proxy decision  
57 makers, in their child's best interests and protect their child from assuming unreasonable risks.<sup>2</sup>  
58 Despite increasing ethical and regulatory scrutiny, deficiencies still exist in parental  
59 understanding; some parents have consented to research without understanding the  
60 experimental nature of it and the risks involved, or even that they are consenting on behalf of  
61 their child.<sup>3-7</sup>

62 An informed consent form (ICF) serves as a mandatory document to provide trial  
63 relevant information to the participants/surrogate decision makers and document their consent;  
64 it consists of the information sheet and the consent certificate. Although the form alone may  
65 not be sufficient to achieve a proper, valid consent, it can and do serve multiple purposes in  
66 clinical trials, including the assurance of complete disclosure of information and enhancement  
67 of participants' comprehension.<sup>8</sup> Ideally, an ICF given to parents in pediatric research should  
68 be complete, concise, and understandable so that it would enable them to come to an informed  
69 decision in regard to their child's participation in a study.<sup>9</sup> In reality, empirical observations  
70 reveal a number of lengthy, detailed, and complicated ICFs which are unlikely to be read and  
71 understood by general laypersons.<sup>10-12</sup> Most ICF templates still seem to require a high level of

1  
2  
3  
4 72 reading comprehension.<sup>13</sup> It has been suggested that the written language in quite a few ICFs  
5  
6  
7 73 stems from a desire to provide legal protection to investigators and sponsors rather than one  
8  
9  
10 74 designed to inform participants/surrogates for rational decision making.<sup>14</sup> At present, there is  
11  
12  
13 75 wide agreement that informed consent (including parental permission) requires more than a  
14  
15  
16 76 signature on a form: efforts should be put to promote understanding of consent information.<sup>15</sup>  
17  
18

19 77 The Strategic Initiative for Developing Capacity in Ethical Review (SIDCER) has  
20  
21  
22 78 recently proposed the ‘enhanced ICF development’ methodology, named ‘SIDCER ICF’, in  
23  
24  
25 79 response to the need for making an ICF complete, concise and understandable.<sup>16</sup> The SIDCER  
26  
27  
28 80 ICF methodology has been tested in real informed consent settings involving several clinical  
29  
30  
31 81 trials and it has been shown to be effective in improving participants’ understanding.<sup>17</sup> As such,  
32  
33  
34 82 it is compelling to extend the application of the SIDCER ICF methodology to clinical research  
35  
36  
37 83 requiring proxy consent. Therefore, the present study was designed to test the applicability and  
38  
39  
40 84 effectiveness of the SIDCER ICF in pediatric research requiring parental consent. The  
41  
42  
43 85 objective of this study was to compare the parental understanding of information between the  
44  
45  
46 86 parents who read the SIDCER ICF and those who read the conventional ICF.  
47  
48  
49  
50  
51  
52  
53  
54  
55  
56  
57  
58  
59  
60



## 87 **Materials and Methods**

88 This open-label, comparative, randomized-controlled study determined the  
89 effectiveness of two different ICFs – the SIDCER ICF and the conventional ICF (1:1) – on  
90 parental understanding of research-related information. The study protocol and related  
91 documents obtained ethical approval from the Institutional Review Board of Royal Thai Army  
92 Medical Department.

### 93 *Study participants*

94 Parents of children with transfusion-dependent thalassemia were informed about this  
95 ICF study and were recruited by study nurse at the Pediatric Outpatients Department,  
96 Phramongkutklao Hospital, Bangkok, Thailand. They were invited to read either the  
97 SIDCER ICF or the conventional ICF (by random assignment) for possible enrollment of their  
98 child (aged 1-18 years) in a drug trial which investigated the effects of furosemide on markers  
99 of volume overload in children with transfusion-dependent thalassemia.<sup>18</sup> Informed consent  
100 was obtained verbally and by action, provided that answering the questionnaire inferred their  
101 consent for participation in this ICF study.

102 This ICF study planned to enroll 210 parents (with 105 parents in each arm), based on  
103 an *a priori* estimate to detect the hypothesized effect size of 20% difference between two  
104 independent proportions of the primary endpoint ( $p_1 = 0.8$  and  $p_2 = 0.6$ ), with the precision and  
105 confidence level of 95%, 80% power and allocation ratio of 1, with a continuity correction.

1  
2  
3  
4 106 This hypothesized effect size was based on the findings in our previous study.<sup>19</sup>  
5  
6

7 107 *Study interventions*  
8  
9

10 108 The effectiveness of two different ICF interventions on parental understanding were  
11  
12  
13 109 compared: one was the original, standard ICF of the pediatric drug trial (in Thai) and another  
14  
15  
16 110 was the enhanced (SIDCER) ICF of the trial (in Thai). The former comprising six pages with  
17  
18  
19 111 2,065 words was considered as the conventional ICF; trial-related information was described  
20  
21  
22 112 using text in standard sequences. The latter comprising four pages with 1,644 words was  
23  
24  
25 113 developed according to the SIDCER ICF methodology, comprehensively described  
26  
27  
28 114 elsewhere.<sup>16</sup> In brief, essential information as is relevant to the parents' decision making was  
29  
30  
31 115 summarized in the SIDCER ICF template (available from [http://ijme.in/pdf/appendix-](http://ijme.in/pdf/appendix-1.pdf?v=1)  
32  
33  
34 116 [1.pdf?v=1](http://ijme.in/pdf/appendix-1.pdf?v=1)) in a narrative and illustrative manner, according to the SIDCER ICF principles. The  
35  
36  
37 117 drafted SIDCER ICF was, then, reviewed by laypersons to enhance the readability and  
38  
39  
40 118 understandability of written information. Both conventional and SIDCER ICFs contained the  
41  
42  
43 119 same content.  
44  
45

46 120 *Study outcomes*  
47  
48

49 121 Parental understanding of essential research-related information was measured using  
50  
51  
52 122 the questionnaire (in Thai), which was modified from our previous studies.<sup>17,19,20</sup> It consisted  
53  
54  
55 123 of 24 scenario-based questions which assessed parental understanding of relevant ICF content  
56  
57  
58 124 in the following categories: general items (five questions), patient's rights (four questions),  
59  
60

1  
2  
3  
4 125 scientific aspects (eight questions), and ethics aspects (seven questions). Each question with  
5  
6  
7 126 three possible answers was structured in a way that the parents would have had to apply their  
8  
9  
10 127 understanding of information given in an ICF to the scenario.<sup>21</sup> In each question, there was  
11  
12  
13 128 only one correct answer, counting as a score of 1, making the total score 24. The primary  
14  
15  
16 129 endpoint was the proportion of parents obtaining the total score of more than 80% ( $\geq 20/24$ ).  
17  
18  
19 130 The secondary endpoints were the total score, the score of each category, and time spent  
20  
21  
22 131 reading a given ICF and completing the questionnaire.

### 25 132 *Study procedure*

28 133 For allocation of the parents, a computer-generated list of random numbers was  
29  
30  
31 134 applied, and a randomization code was packed in an opaque sealed envelope before subject  
32  
33  
34 135 enrollment to this ICF study. Eligible parents were randomly assigned to read either the  
35  
36  
37 136 SIDCER ICF or the conventional ICF. After that, the questionnaire was distributed. The parents  
38  
39  
40 137 could keep and read the ICF while completing the questionnaire, but they could not ask any  
41  
42  
43 138 questions during this process. Time spent reading the given ICF and completing the  
44  
45  
46 139 questionnaire was recorded and this was the end of the ICF study. The informed consent  
47  
48  
49 140 process continued for the clinical trial for both groups in the same manner, that is, informed  
50  
51  
52 141 consent discussion with the parents was conducted and any inaccurate understanding of trial  
53  
54  
55 142 information was explained prior to the parents' decision whether or not to sign consent for their  
56  
57  
58 143 child's participation in the pediatric drug trial.

1  
2  
3  
4 144 *Participant and public involvement*  
5  
6

7 145 The present study did not involve participants or publics during the development of  
8  
9  
10 146 research question and outcome measures as well as in the study design and recruitment plan.  
11  
12  
13 147 Participant burden was not assessed formally, but assumed to be low. Results will be  
14  
15  
16 148 disseminated via this publication, with a lay summary of the results in Thai.

17  
18  
19 149 *Data analysis*  
20  
21

22 150 Descriptive statistics were used to describe the basic features of the data in this study.  
23  
24  
25 151 The proportion of the parents in the SIDCER ICF group who achieved the outcome divided by  
26  
27  
28 152 that of the conventional ICF group was presented using the term 'relative risk' (RR).  
29  
30  
31 153 Dichotomous variables were compared using  $\chi^2$  test or Fisher's exact test, as appropriate.  
32  
33  
34 154 Continuous variables were presented in mean  $\pm$  standard deviation (SD), and the values  
35  
36  
37 155 between the two groups were compared using the Student *t*-test. Cohen's *d* was used to classify  
38  
39  
40 156 the effect size as small ( $d = 0.2$ ), medium ( $d = 0.5$ ), and large ( $d = 0.8$ ).<sup>22</sup> Multivariable linear  
41  
42  
43 157 regression analysis was performed to evaluate the relationship between different ICF  
44  
45  
46 158 interventions and the total score after adjusting for age, gender, and education. All statistical  
47  
48  
49 159 analysis was executed using IBM SPSS Statistics for Windows, Version 22.0, with a *p* value  
50  
51  
52 160 of less than 0.05 considered to indicate statistical significance.  
53  
54  
55  
56  
57  
58  
59  
60

## 161 **Results**

162 Two hundred and ten parents of thalassemia children were enrolled between  
163 September 2015 and September 2016 and equally assigned to the SIDCER ICF group ( $n = 105$ )  
164 and the conventional ICF group ( $n = 105$ ) (Fig. 1). The mean age of 210 enrolled parents was  
165  $35.6 \pm 3.1$  years; 72.9% were female, and 61.0% had education at a bachelor degree or higher  
166 (Table 1).

167 The primary endpoint was achieved by 42.9% and 27.6% of the parents in the SIDCER  
168 ICF group and the conventional ICF group, respectively (RR = 1.552, 95%CI = 1.061 to 2.270,  
169  $p = 0.021$ ). The parents in the SIDCER ICF group obtained higher total scores when compared  
170 to the conventional ICF group (total score:  $18.07 \pm 3.71$  vs.  $15.98 \pm 4.56$ , mean difference =  
171  $2.09$ , 95% CI = 0.96 to 3.22,  $p < 0.001$ ). After adjustment for age, gender, and education, a  
172 significant difference in the total score between the two groups was still evident (B = 2.75, SE  
173 = 0.54, beta = 0.32, 95% CI = 1.69 to 3.81,  $p < 0.001$ ). The values of other secondary endpoints  
174 are presented in Table 2.

175 Proportions of the parents who correctly answered each element of the ICF content  
176 were compared between the two groups. The SIDCER ICF was found to be superior to the  
177 conventional ICF in improving parental understanding on five elements: who can access the  
178 data, right to receive new information, identification of experimental procedures, alternative  
179 course of treatment, and number of subjects required (Table 3). The element that was least

1  
2  
3  
4 180 understood by the parents in both groups was trial treatment and random assignment; only 66  
5  
6  
7 181 (out of 210) parents (31.4%) answered this element correctly.  
8  
9  
10  
11  
12  
13  
14  
15  
16  
17  
18  
19  
20  
21  
22  
23  
24  
25  
26  
27  
28  
29  
30  
31  
32  
33  
34  
35  
36  
37  
38  
39  
40  
41  
42  
43  
44  
45  
46  
47  
48  
49  
50  
51  
52  
53  
54  
55  
56  
57  
58  
59  
60

For peer review only

## 182 Discussion

183 This is the first randomized-controlled study which was designed to test the  
184 applicability and effectiveness of the SIDCER ICF methodology in a setting of pediatric drug  
185 trial. The SIDCER ICF was found to be superior to the conventional ICF in improving parental  
186 understanding of several elements of the ICF content. The overall results of this study are  
187 consistent with three previous informed consent studies that exhibited the improvement of  
188 participants' understanding by the SIDCER ICF.<sup>17,19,20</sup> In line with a recent integrative review  
189 on informed consent, it is reasonable to assume that the evidence of improved participants'  
190 understanding by the SIDCER ICF is largely attributable to its simplicity and concise format  
191 with increased processability (using summary boxes, highlights, and illustrations, when  
192 appropriate).<sup>23</sup>

193 Close examination of the data revealed that the SIDCER ICF was superior to the  
194 conventional ICF in improving the parental understanding of trial information in five elements:  
195 who can access the data, right to receive new information, identification of experimental  
196 procedures, alternative course of treatment, and number of subjects required. The first three  
197 elements were highlighted and made salient in the SIDCER ICF, whereas the same content was  
198 ordinarily described in the conventional ICF. It is reasonable to assume that a higher  
199 understanding of these three elements in the SIDCER ICF group was partly attributed to a  
200 complementary technique being used to convey key information. This might be the evidence

1  
2  
3  
4 201 to support that increased processability of key or complex information in an ICF could  
5  
6  
7 202 contribute to a significant improvement in parental understanding of such information.<sup>23</sup>  
8  
9

10 203 The element that was least understood by the parents in both groups was trial treatment  
11  
12  
13 204 and random assignment. This finding supports lines of the evidence demonstrating that there  
14  
15  
16 205 is the apparent universality of a limited understanding on the aspect of random allocation of  
17  
18  
19 206 the intervention in clinical trials.<sup>24-25</sup> Despite an attempt with increased processability in the  
20  
21  
22 207 SIDCER ICF to aid in description on the concept of randomization (using illustrations and  
23  
24  
25 208 highlights), a large proportion of the parents (63.8%) still did not understand it accurately. This  
26  
27  
28 209 emphasizes the need of increased attention in particular during informed consent discussion to  
29  
30  
31 210 ensure adequate understanding of this concept among individuals who consent to a trial.<sup>26</sup> A  
32  
33  
34 211 combination of the SIDCER ICF methodology with other means (*e.g.*, an integrated cognitive  
35  
36  
37 212 approach<sup>27</sup>) may enhance parental understanding of this information in pediatric research.  
38  
39

40 213 Although the overall results demonstrated that the SIDCER ICF was proven superior  
41  
42  
43 214 to the conventional ICF, the degree of parental understanding remained unsatisfactory.  
44  
45  
46 215 Deficiencies in understanding were still prevalent even among those who read the SIDCER  
47  
48  
49 216 ICF. Continued consideration of the normative and practical aspects of informed consent is  
50  
51  
52 217 needed in an attempt to facilitate understanding among parents who act as proxies for their  
53  
54  
55 218 child's participation in research.<sup>28,29</sup> It may be worthwhile to consider using more graphics or  
56  
57  
58 219 pictographs to enhance visualization of complex information in the SIDCER ICF,<sup>30</sup> and further  
59  
60



1  
2  
3  
4 220 research may be required to determine the effectiveness of such additional means, especially  
5  
6  
7 221 in this group of population. In addition to the enhanced ICF, a dialogue between the investigator  
8  
9  
10 222 (or a person designated by the investigator) and the parents are still indispensable, while  
11  
12  
13 223 complimentary methods of delivering trial-related information (*e.g.*, a multimedia video and  
14  
15  
16 224 website<sup>27</sup>) may be warranted in some studies. Furthermore, formal evaluation of parental  
17  
18  
19 225 understanding during the process of informed consent may be necessary, especially in pediatric  
20  
21  
22 226 research that poses relatively high risks, with little or no potential direct benefit, to child  
23  
24  
25 227 subjects.<sup>31,32</sup> Accordingly, any inaccuracy of parental understanding could be rectified to  
26  
27  
28 228 ascertain the validity of parental consent obtained in such research.

29  
30  
31 229 Of note, this study was confined to parental understanding of an ICF while the child's  
32  
33  
34 230 understanding of an assent form was not studied. It is also possible that the SIDCER ICF  
35  
36  
37 231 methodology may be modified and used to improve the quality of assent forms for pediatric  
38  
39  
40 232 populations. As such, further ICF studies involving pediatric populations are warranted.

41  
42  
43 233 In conclusion, the present study demonstrated that the SIDCER ICF methodology was  
44  
45  
46 234 applicable to pediatric research requiring parental consent and effective in improving parental  
47  
48  
49 235 understanding of trial information. However, deficiencies in understanding were still prevalent  
50  
51  
52 236 among the parents of child subjects, at least, in this setting, suggesting that further research is  
53  
54  
55 237 required to improve parental understanding in pediatric research.  
56  
57  
58  
59  
60

1  
2  
3  
4 238 **Acknowledgements:** We thank Dr. Piyarat Simthamnimit and Dr. Chalinee Monsereenusorn,  
5  
6  
7 239 the investigators of the pediatric drug trial, for their collaboration. Thanks are extended to Ms.  
8  
9  
10 240 Chotimanee Kaewserm and her colleagues for their assistance in reviewing the SIDCER ICF  
11  
12  
13 241 from laypersons' perspectives.

14  
15  
16 242 **Contributor:** The study was designed by Nut Koonrungsesomboon and Juntra Karbwang, and  
17  
18  
19 243 conducted by Chanchai Traivaree and Charnunnut Tiyapsane. Data analysis was done by Nut  
20  
21  
22 244 Koonrungsesomboon. The manuscript was written by Nut Koonrungsesomboon and revised  
23  
24  
25 245 by Juntra Karbwang, with contributions from all authors. All authors approved the final version  
26  
27  
28 246 submitted.

29  
30  
31 247 **Funding:** This study was partially supported by Phramongkutklao Hospital and  
32  
33  
34 248 Phramongkutklao College of Medicine, Chiang Mai University, and TDR, the Special  
35  
36  
37 249 Programme for Research and Training in Tropical Diseases, co-sponsored by UNICEF, UNDP,  
38  
39  
40 250 the World Bank, and WHO through the Forum for Ethical Review Committees in the Asian  
41  
42  
43 251 and Western Pacific region (FERCAP). The funding sources had no role in the analysis and  
44  
45  
46 252 interpretation of the data; preparation, review or approval of the manuscript; and decision to  
47  
48  
49 253 submit this manuscript for publication.

50  
51  
52 254 **Competing interests:** We have read and understood BMJ policy on declaration of interests  
53  
54  
55 255 and declare that we have no competing interests.

56  
57  
58 256 **Ethics approval:** This study was approved by the Institutional Review Board of Royal Thai  
59  
60

1  
2  
3  
4 257 Army Medical Department (No. IRB/RTA1200/2557). Informed consent was obtained by  
5  
6  
7 258 action.

8  
9  
10 259 **Data sharing statement:** Deidentified participant data will be available upon reasonable  
11  
12  
13 260 request by contacting the corresponding author.  
14  
15  
16  
17  
18  
19  
20  
21  
22  
23  
24  
25  
26  
27  
28  
29  
30  
31  
32  
33  
34  
35  
36  
37  
38  
39  
40  
41  
42  
43  
44  
45  
46  
47  
48  
49  
50  
51  
52  
53  
54  
55  
56  
57  
58  
59  
60

For peer review only

1  
2  
3  
4 261 **References**

- 5  
6  
7 262 1. Roth-Cline M, Nelson RM. Parental permission and child assent in research on children.  
8  
9  
10 263 Yale J Biol Med 2013;86:291-301.  
11  
12  
13 264 2. Leibson T, Koren G. Informed consent in pediatric research. Paediatr Drugs 2015;17:5-11.  
14  
15  
16 265 3. Franck LS, Winter I, Oulton K. The quality of parental consent for research with children:  
17  
18  
19 266 a prospective repeated measure self-report survey. Int J Nurs Stud 2007;44:525-533.  
20  
21  
22 267 4. Pace C, Talisuna A, Wendler D, et al. Quality of parental consent in a Ugandan malaria  
23  
24  
25 268 study. Am J Public Health 2005;95:1184-1189.  
26  
27  
28 269 5. Chappuy H, Baruchel A, Leverger G, et al. Parental comprehension and satisfaction in  
29  
30  
31 270 informed consent in paediatric clinical trials: a prospective study on childhood leukaemia.  
32  
33  
34 271 Arch Dis Child 2010;95:800-804.  
35  
36  
37 272 6. Chappuy H, Doz F, Blanche S, et al. Parental consent in paediatric clinical research. Arch  
38  
39  
40 273 Dis Child 2006;91:112-116.  
41  
42  
43 274 7. Chappuy H, Bouazza N, Minard-Colin V, et al. Parental comprehension of the  
44  
45  
46 275 benefits/risks of first-line randomised clinical trials in children with solid tumours: a two-  
47  
48  
49 276 stage cross-sectional interview study. BMJ Open 2013;3:e002733.  
50  
51  
52 277 8. Sugarman J. Examining provisions related to consent in the revised Common Rule. Am J  
53  
54  
55 278 Bioeth 2017;17:22-26.  
56  
57  
58  
59  
60

- 1  
2  
3  
4 279 9. Hazen RA, Drotar D, Kodish E. The role of the consent document in informed consent for  
5  
6  
7 280 pediatric leukemia trials. *Contemp Clin Trials* 2007;28:401-408.  
8  
9  
10 281 10. Berger O, Grønberg BH, Sand K, et al. The length of consent documents in oncological  
11  
12  
13 282 trials is doubled in twenty years. *Ann Oncol* 2009;20:379-385.  
14  
15  
16 283 11. Kass NE, Chaisson L, Taylor HA, Lohse J. Length and complexity of US and international  
17  
18  
19 284 HIV consent forms from federal HIV network trials. *J Gen Intern Med* 2011;26:1324-1328.  
20  
21  
22 285 12. Wen G, Liu X, Huang L, et al. Readability and content assessment of informed consent  
23  
24  
25 286 forms for phase II-IV clinical trials in China. *PLoS One* 2016;11:e0164251.  
26  
27  
28 287 13. Villafranca A, Kereliuk S, Hamlin C, et al. The appropriateness of language found in  
29  
30  
31 288 research consent form templates: a computational linguistic analysis. *PLoS One*  
32  
33  
34 289 2017;12:30169143.  
35  
36  
37 290 14. Bhutta ZA. Beyond informed consent. *Bull World Health Organ* 2004;82:771-777.  
38  
39  
40 291 15. Nishimura A, Carey J, Erwin PJ, et al. Improving understanding in the research informed  
41  
42  
43 292 consent process: a systematic review of 54 interventions tested in randomized control trials.  
44  
45  
46 293 *BMC Med Ethics* 2013;14:28.  
47  
48  
49 294 16. Koonrunsesomboon N, Laothavorn J, Chokevivat V, et al. SIDCER informed consent  
50  
51  
52 295 form: principles and a developmental guideline. *Indian J Med Ethics* 2016;1:83-86.  
53  
54  
55 296 17. Koonrunsesomboon N, Tharavanij T, Phiphatpatthamaamphan K, et al. Improved  
56  
57  
58 297 participants' understanding of research information in real settings using the SIDCER  
59  
60

- 1  
2  
3  
4 298 informed consent form: a randomized-controlled informed consent study nested with eight  
5  
6  
7 299 clinical trials. *Eur J Clin Pharmacol* 2017;73:141-149.  
8  
9  
10 300 18. Simthamnimit P, Traivaree C, Monsereenusorn C, Torcharus K. Efficacy of furosemide for  
11  
12  
13 301 prevention of volume overload in children with transfusion-dependent thalassemia at  
14  
15  
16 302 Phramongkutklao Hospital. *Royal Thai Army Med J* 2015;68:81-82.  
17  
18  
19 303 19. Koonrunsesomboon N, Teekachunhatean S, Hanprasertpong N, et al. Improved  
20  
21  
22 304 participants' understanding in a healthy volunteer study using the SIDCER informed  
23  
24  
25 305 consent form: a randomized-controlled study. *Eur J Clin Pharmacol* 2016;72:413-421.  
26  
27  
28 306 20. Koonrunsesomboon N, Traivaree C, Chamnanvanakij S, et al. Improved pregnant  
29  
30  
31 307 women's understanding of research information by an enhanced informed consent form: a  
32  
33  
34 308 randomised controlled study nested in neonatal research. *Arch Dis Child Fetal Neonatal Ed*  
35  
36  
37 309 2018;103:F403-F407.  
38  
39  
40 310 21. Koonrunsesomboon N, Laothavorn J, Karbwang J. Understanding of essential elements  
41  
42  
43 311 required in informed consent form among researchers and institutional review board  
44  
45  
46 312 members. *Trop Med Health* 2015;43:117-122.  
47  
48  
49 313 22. Kim HY. Statistical notes for clinical researchers: effect size. *Restor Dent Endod*  
50  
51  
52 314 2015;40:328-331.  
53  
54  
55 315 23. Foe G, Larson EL. Reading level and comprehension of research consent forms: an  
56  
57  
58 316 integrative review. *J Empir Res Hum Res Ethics* 2016;11:31-46.  
59  
60

- 1  
2  
3  
4 317 24. Kupst MJ, Patenaude AF, Walco GA, Sterling C. Clinical trials in pediatric cancer: parental  
5  
6  
7 318 perspectives on informed consent. *J Pediatr Hematol Oncol* 2003;25:787-790.  
8  
9  
10 319 25. Kodish E, Eder M, Noll RB, et al. Communication of randomization in childhood leukemia  
11  
12  
13 320 trials. *JAMA* 2004;291:470-475.  
14  
15  
16 321 26. Carvalho AA, Costa LR. Mothers' perceptions of their child's enrollment in a randomized  
17  
18  
19 322 clinical trial: poor understanding, vulnerability and contradictory feelings. *BMC Med*  
20  
21  
22 323 *Ethics* 2013;14:52.  
23  
24  
25 324 27. Antal H, Bunnell HT, McCahan SM, et al. A cognitive approach for design of a multimedia  
26  
27  
28 325 informed consent video and website in pediatric research. *J Biomed Inform* 2017;66:248-  
29  
30  
31 326 258.  
32  
33  
34 327 28. Shilling V, Young B. How do parents experience being asked to enter a child in a  
35  
36  
37 328 randomised controlled trial? *BMC Med Ethics* 2009;10:1.  
38  
39  
40 329 29. Alahmad G. Informed consent in pediatric oncology: a systematic review of qualitative  
41  
42  
43 330 literature. *Cancer Control* 2018;25:1073274818773720.  
44  
45  
46 331 30. Tait AR, Voepel-Lewis T, Zikmund-Fisher BJ, Fagerlin A. The effect of format on parents'  
47  
48  
49 332 understanding of the risks and benefits of clinical research: a comparison between text,  
50  
51  
52 333 tables, and graphics. *J Health Commun* 2010;15:487-501.  
53  
54  
55 334 31. Wendler D. How to enroll participants in research ethically. *JAMA* 2011;305:1587-1588.  
56  
57  
58  
59  
60

1  
2  
3  
4  
5  
6  
7  
8  
9  
10  
11  
12  
13  
14  
15  
16  
17  
18  
19  
20  
21  
22  
23  
24  
25  
26  
27  
28  
29  
30  
31  
32  
33  
34  
35  
36  
37  
38  
39  
40  
41  
42  
43  
44  
45  
46  
47  
48  
49  
50  
51  
52  
53  
54  
55  
56  
57  
58  
59  
60

335 32. Bromwich D, Rid A. Can informed consent to research be adapted to risk? J Med Ethics  
336 2015;41:521-528.

For peer review only



337 **Table 1** Demographic data of the parents ( $n = 210$ )

|                          | <b>SIDCER ICF</b><br>( $n = 105$ ) | <b>Conventional ICF</b><br>( $n = 105$ ) |
|--------------------------|------------------------------------|------------------------------------------|
| <b>Gender (n)</b>        |                                    |                                          |
| Male                     | 30 (28.6%)                         | 27 (25.7%)                               |
| Female                   | 75 (71.4%)                         | 78 (74.3%)                               |
| <b>Age (year)</b>        | 33.9 ± 12.7                        | 37.4 ± 13.3                              |
| <b>Education (n)</b>     |                                    |                                          |
| High school or below     | 49 (46.7%)                         | 33 (31.4%)                               |
| Bachelor degree or above | 56 (53.3%)                         | 72 (68.6%)                               |

338 Data represent the number (percentage) of parents or mean ± SD.

339

340 **Table 2** Comparisons of the total score, the score in each category of the ICF content, and time  
 341 spent between the two groups

|                                                   | <b>SIDCER<br/>ICF<br/>(n = 105)</b> | <b>Conventional<br/>ICF<br/>(n = 105)</b> | <b>Mean<br/>difference</b> | <b>95% CI</b>     | <b>p value*</b> | <b>Effect<br/>size**</b> |
|---------------------------------------------------|-------------------------------------|-------------------------------------------|----------------------------|-------------------|-----------------|--------------------------|
| Total score (out of 24)                           | 18.07 ± 3.71                        | 15.98 ± 4.56                              | 2.09                       | (0.96 to 3.22)    | <0.001          | 0.49                     |
| Score in the general items (out of 5)             | 3.99 ± 1.05                         | 3.71 ± 1.16                               | 0.28                       | (-0.03 to 0.58)   | 0.072           | 0.25                     |
| Score in the patient's rights (out of 4)          | 3.41 ± 0.83                         | 3.23 ± 1.07                               | 0.18                       | (-0.08 to 0.44)   | 0.172           | 0.19                     |
| Score in the scientific aspects (out of 8)        | 5.51 ± 1.70                         | 4.50 ± 1.80                               | 1.02                       | (0.54 to 1.50)    | <0.001          | 0.56                     |
| Score in the ethics aspects (out of 7)            | 5.15 ± 1.52                         | 4.54 ± 1.74                               | 0.61                       | (0.17 to 1.05)    | 0.007           | 0.37                     |
| Time spent reading a given ICF (minutes)          | 23.61 ± 12.51                       | 30.90 ± 15.45                             | -7.30                      | (-11.12 to -3.47) | <0.001          | 0.50                     |
| Time spent completing the questionnaire (minutes) | 24.48 ± 12.84                       | 30.59 ± 13.29                             | -6.11                      | (-9.67 to -2.56)  | 0.001           | 0.46                     |

342 Data represent mean ± SD. \*Student *t*-test. \*\*Cohen's *d* value.

343

344 **Table 3** Comparisons of the parental understanding of each element of the ICF content between  
 345 the two groups

|                                               | SIDCER ICF<br>(n = 105) | Conventional<br>ICF (n = 105) | Relative Risk (95%CI) | p value* |
|-----------------------------------------------|-------------------------|-------------------------------|-----------------------|----------|
| <b>General items</b>                          |                         |                               |                       |          |
| 1. Recognition that this is research          | 80 (76.2%)              | 78 (74.3%)                    | 1.026 (0.878-1.198)   | 0.749    |
| 2. Subjects' responsibility                   | 85 (81.0%)              | 84 (80.0%)                    | 1.012 (0.886-1.156)   | 0.862    |
| 3. Confidentiality of records                 | 74 (70.5%)              | 64 (61.0%)                    | 1.156 (0.950-1.408)   | 0.146    |
| 4. Who can access the data                    | 82 (78.1%)              | 68 (64.8%)                    | 1.206 (1.014-1.435)   | 0.032    |
| 5. Research contact persons                   | 98 (93.3%)              | 96 (91.4%)                    | 1.021 (0.944-1.103)   | 0.603    |
| <b>Patient's rights</b>                       |                         |                               |                       |          |
| 6. Right to refuse                            | 76 (72.4%)              | 87 (82.9%)                    | 0.874 (0.754-1.012)   | 0.069    |
| 7. Right to withdraw                          | 95 (90.5%)              | 87 (82.9%)                    | 1.092 (0.981-1.215)   | 0.104    |
| 8. Consequences of withdrawal                 | 96 (91.4%)              | 87 (82.9%)                    | 1.103 (0.994-1.225)   | 0.064    |
| 9. Right to receive new information           | 91 (86.7%)              | 78 (74.3%)                    | 1.167 (1.019-1.336)   | 0.024    |
| <b>Scientific aspects</b>                     |                         |                               |                       |          |
| 10. Eligibility of the subject                | 81 (77.1%)              | 72 (68.6%)                    | 1.125 (0.953-1.328)   | 0.163    |
| 11. Number of subjects required               | 87 (82.9%)              | 43 (41.0%)                    | 2.023 (1.583-2.587)   | <0.001   |
| 12. Purpose of the study                      | 80 (76.2%)              | 75 (71.4%)                    | 1.067 (0.908-1.254)   | 0.433    |
| 13. Trial treatment and random assignment     | 38 (36.2%)              | 28 (26.7%)                    | 1.357 (0.904-2.038)   | 0.137    |
| 14. Trial procedures                          | 65 (61.9%)              | 52 (49.5%)                    | 1.250 (0.979-1.596)   | 0.071    |
| 15. Identification of experimental procedures | 80 (76.2%)              | 66 (62.9%)                    | 1.212 (1.011-1.454)   | 0.036    |
| 16. Duration of the subject's participation   | 88 (83.8%)              | 79 (75.2%)                    | 1.114 (0.970-1.279)   | 0.124    |
| 17. Storage and reuse of human materials      | 60 (57.1%)              | 57 (54.3%)                    | 1.053 (0.827-1.340)   | 0.677    |
| <b>Ethics aspects</b>                         |                         |                               |                       |          |
| 18. Alternative course of treatment           | 94 (89.5%)              | 82 (78.1%)                    | 1.146 (1.016-1.293)   | 0.025    |
| 19. Foreseeable risks                         | 70 (66.7%)              | 61 (58.1%)                    | 1.148 (0.929-1.418)   | 0.200    |
| 20. Expected direct/indirect benefits         | 52 (49.5%)              | 42 (40.0%)                    | 1.238 (0.914-1.677)   | 0.165    |
| 21. Post-trial benefits                       | 82 (78.1%)              | 72 (68.6%)                    | 1.139 (0.966-1.342)   | 0.119    |
| 22. Prorated payment for participation        | 91 (86.7%)              | 84 (80.0%)                    | 1.083 (0.959-1.223)   | 0.195    |
| 23. Anticipated expenses                      | 60 (57.1%)              | 53 (50.5%)                    | 1.132 (0.880-1.456)   | 0.333    |
| 24. Compensation for injury                   | 92 (87.6%)              | 83 (79.0%)                    | 1.108 (0.981-1.252)   | 0.096    |

346 Data represent the number (percentage) of parents. \* $\chi^2$  test.

1  
2  
3  
4  
5  
6  
7  
8  
9  
10  
11  
12  
13  
14  
15  
16  
17  
18  
19  
20  
21  
22  
23  
24  
25  
26  
27  
28  
29  
30  
31  
32  
33  
34  
35  
36  
37  
38  
39  
40  
41  
42  
43  
44  
45  
46  
47  
48  
49  
50  
51  
52  
53  
54  
55  
56  
57  
58  
59  
60

347 **Figure legends**

348 **Fig. 1** Flow diagram of this ICF study

For peer review only

1  
2  
3  
4  
5  
6  
7  
8  
9  
10  
11  
12  
13  
14  
15  
16  
17  
18  
19  
20  
21  
22  
23  
24  
25  
26  
27  
28  
29  
30  
31  
32  
33  
34  
35  
36  
37  
38  
39  
40  
41  
42  
43  
44  
45  
46  
47  
48  
49  
50  
51  
52  
53  
54  
55  
56  
57  
58  
59  
60

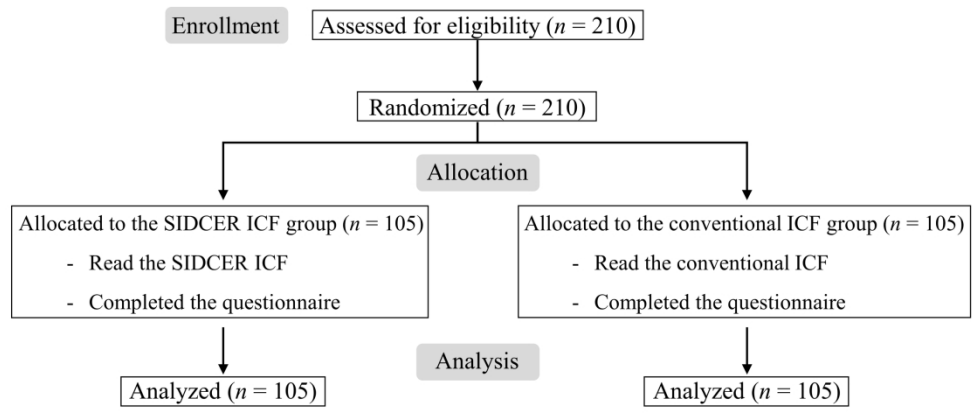

Fig. 1 Flow diagram of this ICF study

227x98mm (300 x 300 DPI)



## CONSORT 2010 checklist of information to include when reporting a randomised trial\*

| Section/Topic                    | Item No | Checklist item                                                                                                                                                                              | Reported on page No |
|----------------------------------|---------|---------------------------------------------------------------------------------------------------------------------------------------------------------------------------------------------|---------------------|
| <b>Title and abstract</b>        |         |                                                                                                                                                                                             |                     |
|                                  | 1a      | Identification as a randomised trial in the title                                                                                                                                           | 1                   |
|                                  | 1b      | Structured summary of trial design, methods, results, and conclusions (for specific guidance see CONSORT for abstracts)                                                                     | 3-4                 |
| <b>Introduction</b>              |         |                                                                                                                                                                                             |                     |
| Background and objectives        | 2a      | Scientific background and explanation of rationale                                                                                                                                          | 6-7                 |
|                                  | 2b      | Specific objectives or hypotheses                                                                                                                                                           | 7                   |
| <b>Methods</b>                   |         |                                                                                                                                                                                             |                     |
| Trial design                     | 3a      | Description of trial design (such as parallel, factorial) including allocation ratio                                                                                                        | 8                   |
|                                  | 3b      | Important changes to methods after trial commencement (such as eligibility criteria), with reasons                                                                                          | n/a                 |
| Participants                     | 4a      | Eligibility criteria for participants                                                                                                                                                       | 8                   |
|                                  | 4b      | Settings and locations where the data were collected                                                                                                                                        | 8                   |
| Interventions                    | 5       | The interventions for each group with sufficient details to allow replication, including how and when they were actually administered                                                       | 9                   |
| Outcomes                         | 6a      | Completely defined pre-specified primary and secondary outcome measures, including how and when they were assessed                                                                          | 9-10                |
|                                  | 6b      | Any changes to trial outcomes after the trial commenced, with reasons                                                                                                                       | n/a                 |
| Sample size                      | 7a      | How sample size was determined                                                                                                                                                              | 8-9                 |
|                                  | 7b      | When applicable, explanation of any interim analyses and stopping guidelines                                                                                                                | n/a                 |
| <b>Randomisation:</b>            |         |                                                                                                                                                                                             |                     |
| Sequence generation              | 8a      | Method used to generate the random allocation sequence                                                                                                                                      | 10                  |
|                                  | 8b      | Type of randomisation; details of any restriction (such as blocking and block size)                                                                                                         | 10                  |
| Allocation concealment mechanism | 9       | Mechanism used to implement the random allocation sequence (such as sequentially numbered containers), describing any steps taken to conceal the sequence until interventions were assigned | 10                  |
|                                  | 10      | Who generated the random allocation sequence, who enrolled participants, and who assigned participants to interventions                                                                     | 10                  |

|    |                                                      |     |                                                                                                                                                   |                 |
|----|------------------------------------------------------|-----|---------------------------------------------------------------------------------------------------------------------------------------------------|-----------------|
| 1  | Blinding                                             | 11a | If done, who was blinded after assignment to interventions (for example, participants, care providers, those assessing outcomes) and how          | n/a             |
| 2  |                                                      |     |                                                                                                                                                   |                 |
| 3  |                                                      | 11b | If relevant, description of the similarity of interventions                                                                                       | n/a             |
| 4  | Statistical methods                                  | 12a | Statistical methods used to compare groups for primary and secondary outcomes                                                                     | 11              |
| 5  |                                                      | 12b | Methods for additional analyses, such as subgroup analyses and adjusted analyses                                                                  | 11              |
| 6  |                                                      |     |                                                                                                                                                   |                 |
| 7  | <b>Results</b>                                       |     |                                                                                                                                                   |                 |
| 8  | Participant flow (a diagram is strongly recommended) | 13a | For each group, the numbers of participants who were randomly assigned, received intended treatment, and were analysed for the primary outcome    | 12              |
| 9  |                                                      | 13b | For each group, losses and exclusions after randomisation, together with reasons                                                                  | n/a             |
| 10 | Recruitment                                          | 14a | Dates defining the periods of recruitment and follow-up                                                                                           | 12              |
| 11 |                                                      | 14b | Why the trial ended or was stopped                                                                                                                | n/a             |
| 12 | Baseline data                                        | 15  | A table showing baseline demographic and clinical characteristics for each group                                                                  | Table 1         |
| 13 | Numbers analysed                                     | 16  | For each group, number of participants (denominator) included in each analysis and whether the analysis was by original assigned groups           | Fig. 1          |
| 14 |                                                      |     |                                                                                                                                                   |                 |
| 15 | Outcomes and estimation                              | 17a | For each primary and secondary outcome, results for each group, and the estimated effect size and its precision (such as 95% confidence interval) | 12-13, Tables 2 |
| 16 |                                                      | 17b | For binary outcomes, presentation of both absolute and relative effect sizes is recommended                                                       | 12-13           |
| 17 | Ancillary analyses                                   | 18  | Results of any other analyses performed, including subgroup analyses and adjusted analyses, distinguishing pre-specified from exploratory         | 12-13, Table 3  |
| 18 |                                                      |     |                                                                                                                                                   |                 |
| 19 | Harms                                                | 19  | All important harms or unintended effects in each group (for specific guidance see CONSORT for harms)                                             | n/a             |
| 20 |                                                      |     |                                                                                                                                                   |                 |
| 21 | <b>Discussion</b>                                    |     |                                                                                                                                                   |                 |
| 22 | Limitations                                          | 20  | Trial limitations, addressing sources of potential bias, imprecision, and, if relevant, multiplicity of analyses                                  | 14-16           |
| 23 | Generalisability                                     | 21  | Generalisability (external validity, applicability) of the trial findings                                                                         | 14-16           |
| 24 | Interpretation                                       | 22  | Interpretation consistent with results, balancing benefits and harms, and considering other relevant evidence                                     | 14-16           |
| 25 |                                                      |     |                                                                                                                                                   |                 |
| 26 | <b>Other information</b>                             |     |                                                                                                                                                   |                 |
| 27 | Registration                                         | 23  | Registration number and name of trial registry                                                                                                    | n/a             |
| 28 | Protocol                                             | 24  | Where the full trial protocol can be accessed, if available                                                                                       | n/a             |
| 29 | Funding                                              | 25  | Sources of funding and other support (such as supply of drugs), role of funders                                                                   | 17              |

n/a, not applicable

# BMJ Open

## Improved parental understanding by an enhanced informed consent form: a randomized controlled study nested in a pediatric drug trial

|                                 |                                                                                                                                                                                                                                                                                        |
|---------------------------------|----------------------------------------------------------------------------------------------------------------------------------------------------------------------------------------------------------------------------------------------------------------------------------------|
| Journal:                        | <i>BMJ Open</i>                                                                                                                                                                                                                                                                        |
| Manuscript ID                   | bmjopen-2019-029530.R2                                                                                                                                                                                                                                                                 |
| Article Type:                   | Original research                                                                                                                                                                                                                                                                      |
| Date Submitted by the Author:   | 29-Sep-2019                                                                                                                                                                                                                                                                            |
| Complete List of Authors:       | Koonrunsesomboon, Nut; Chiang Mai University Faculty of Medicine Traivaree, Chanchai; Phramongkutklao College of Medicine Tiypsane, Charnunnut; Phramongkutklao College of Medicine Karbwang, Juntra; Nagasaki University Institute of Tropical Medicine, Clinical Product Development |
| <b>Primary Subject Heading</b>: | Ethics                                                                                                                                                                                                                                                                                 |
| Secondary Subject Heading:      | Paediatrics                                                                                                                                                                                                                                                                            |
| Keywords:                       | Informed consent, Parental consent, Consent forms, Pediatrics, Comprehension                                                                                                                                                                                                           |
|                                 |                                                                                                                                                                                                                                                                                        |

SCHOLARONE™  
Manuscripts



**TITLE PAGE**

**Title:** Improved parental understanding by an enhanced informed consent form: a randomized controlled study nested in a pediatric drug trial

**Author names and affiliations:** Nut Koonrunsesomboon<sup>1,2</sup>, Chanchai Traivaree<sup>3</sup>, Charnunnut Tiyapsane<sup>3</sup>, Juntra Karbwang<sup>4</sup>

<sup>1</sup>Department of Pharmacology, Faculty of Medicine, Chiang Mai University, Chiang Mai, Thailand.

<sup>2</sup>Musculoskeletal Science and Translational Research Center, Chiang Mai University, Chiang Mai, Thailand.

<sup>3</sup>Department of Pediatrics, Phramongkutklo Hospital and Phramongkutklo College of Medicine, Bangkok, Thailand.

<sup>4</sup>Department of Clinical Product Development, Institute of Tropical Medicine, Nagasaki University, Nagasaki, Japan.

**Corresponding author:** Juntra Karbwang, M.D., Ph.D., Department of Clinical Product Development, Institute of Tropical Medicine, Nagasaki University, 1-12-4 Sakamoto, Nagasaki 852-8523, Japan, Tel: +81-95-819-7558, Fax: +81-95-819-7846, Email address: karbwangj@nagasaki-u.ac.jp or jkarbwang@yahoo.com

**Email address:** Nut Koonrunsesomboon: nkoonrung@gmail.com; Chanchai Traivaree: ctrivaree@yahoo.com; Charnunnut Tiyapsane: charnunnut332@gmail.com; Juntra Karbwang:

1  
2  
3  
4 20 jkarbwang@yahoo.com  
5  
6

7 21 **Key words:** Informed consent; Parental consent; Pediatrics; Consent forms; Comprehension.  
8  
9  
10  
11  
12  
13  
14  
15  
16  
17  
18  
19  
20  
21  
22  
23  
24  
25  
26  
27  
28  
29  
30  
31  
32  
33  
34  
35  
36  
37  
38  
39  
40  
41  
42  
43  
44  
45  
46  
47  
48  
49  
50  
51  
52  
53  
54  
55  
56  
57  
58  
59  
60

For peer review only

1  
2  
3  
4 **22 Abstract**

5  
6  
7 *23 Objective:* This study was designed to evaluate the applicability and effectiveness of the  
8  
9  
10 *24 enhanced informed consent form (ICF) methodology, proposed by the Strategic Initiative for*  
11  
12  
13 *25 Developing Capacity in Ethical Review (SIDCER), in pediatric research requiring parental*  
14  
15  
16 *26 consent. The objective of this study was to compare the parental understanding of information*  
17  
18  
19 *27 between the parents who read the SIDCER ICF and those who read the conventional ICF.*

20  
21  
22 *28 Design:* A prospective, randomized-controlled design.

23  
24  
25 *29 Setting:* Pediatric Outpatients Department, Phramongkutklo Hospital, Thailand.

26  
27  
28 *30 Participants:* 210 parents of children with thalassemia (age =  $35.6 \pm 13.1$  years).

29  
30  
31 *31 Interventions:* The parents were randomly assigned to read either the SIDCER ICF ( $n = 105$ )  
32  
33  
34 *32 or the conventional ICF ( $n = 105$ ) of a pediatric drug trial.*

35  
36  
37 *33 Primary and secondary outcome measures:* Parental understanding of trial information was  
38  
39  
40 *34 determined using 24 scenario-based questions. The primary endpoint was the proportion of*  
41  
42  
43 *35 parents who obtained the understanding score of more than 80%, and the secondary endpoint*  
44  
45  
46 *36 was the total score.*

47  
48  
49 *37 Results:* Forty-five parents (42.9%) in the SIDCER ICF group and 29 parents (27.6%) in the  
50  
51  
52 *38 conventional ICF group achieved the primary endpoint (relative risk = 1.552, 95%CI = 1.061*  
53  
54  
55 *39 to 2.270,  $p = 0.021$ ). The total score of the parents in the SIDCER ICF group was significantly*  
56  
57  
58 *40 higher than the conventional ICF group ( $18.07 \pm 3.71$  vs.  $15.98 \pm 4.56$ ,  $p = 0.001$ ).*

1  
2  
3  
4 41 *Conclusions:* The SIDCER ICF was found to be superior to the conventional ICF in improving  
5  
6  
7 42 parental understanding of trial information.  
8  
9  
10  
11  
12  
13  
14  
15  
16  
17  
18  
19  
20  
21  
22  
23  
24  
25  
26  
27  
28  
29  
30  
31  
32  
33  
34  
35  
36  
37  
38  
39  
40  
41  
42  
43  
44  
45  
46  
47  
48  
49  
50  
51  
52  
53  
54  
55  
56  
57  
58  
59  
60

For peer review only

1  
2  
3  
4 43 **Strengths and limitations of the study**

- 5  
6  
7 44 • This study was a comparative, randomized-controlled study, in which the SIDCER ICF  
8  
9  
10 45 (study intervention) was directly compared to the conventional ICF (control) to  
11  
12  
13 46 establish superiority.
- 14  
15  
16 47 • This study was conducted on actual parents deciding whether or not to allow their child  
17  
18  
19 48 to participate in a pediatric drug trial.
- 20  
21  
22 49 • This study was confined to the parental understanding of an ICF while the child's  
23  
24  
25 50 understanding of an assent form was not studied.
- 26  
27  
28 51 • The findings were largely confined to research contexts in Thailand and may not  
29  
30  
31 52 account for other settings.
- 32  
33  
34  
35  
36  
37  
38  
39  
40  
41  
42  
43  
44  
45  
46  
47  
48  
49  
50  
51  
52  
53  
54  
55  
56  
57  
58  
59  
60

## 53 Introduction

54 In pediatric research, enrollment of child subjects generally requires parental  
55 permission.<sup>1</sup> Adequate parental understanding of trial information is one of the keys to the  
56 ethical conduct of pediatric research because informed parents can act, as proxy decision  
57 makers, in their child's best interests and protect their child from assuming unreasonable risks.<sup>2</sup>  
58 Despite increasing ethical and regulatory scrutiny, deficiencies still exist in parental  
59 understanding; some parents have consented to research without understanding the  
60 experimental nature of it and the risks involved, or even that they are consenting on behalf of  
61 their child.<sup>3-7</sup>

62 An informed consent form (ICF) serves as a mandatory document to provide trial  
63 relevant information to the participants/surrogate decision makers and document their consent;  
64 it consists of the information sheet and the consent certificate. Although the form alone may  
65 not be sufficient to achieve a proper, valid consent, it does serve multiple purposes in clinical  
66 trials, including the assurance of complete disclosure of information and the enhancement of  
67 participants' comprehension.<sup>8</sup> Ideally, an ICF given to parents in pediatric research should be  
68 complete, concise, and understandable so that it would enable them to come to an informed  
69 decision in regard to their child's participation in a study.<sup>9</sup> In reality, empirical observations  
70 reveal a number of lengthy, detailed, and complicated ICFs which are unlikely to be read and  
71 understood by general laypersons.<sup>10-12</sup> Most ICF templates still seem to require a high level of

1  
2  
3  
4 72 reading comprehension.<sup>13</sup> It has been suggested that the written language in quite a few ICFs  
5  
6  
7 73 stems from a desire to provide legal protection to investigators and sponsors rather than one  
8  
9  
10 74 designed to inform participants/surrogates for rational decision making.<sup>14</sup> At present, there is  
11  
12  
13 75 wide agreement that informed consent (including parental permission) requires more than a  
14  
15  
16 76 signature on a form: efforts should be put to promote understanding of consent information.<sup>15</sup>  
17  
18

19 77 The Strategic Initiative for Developing Capacity in Ethical Review (SIDCER) has  
20  
21  
22 78 recently proposed the 'enhanced ICF development' methodology, named 'SIDCER ICF', in  
23  
24  
25 79 response to the need for making an ICF complete, concise and understandable.<sup>16</sup> The SIDCER  
26  
27  
28 80 ICF methodology has been tested in real informed consent settings involving several clinical  
29  
30  
31 81 trials and it has been shown to be effective in improving participants' understanding.<sup>17</sup> As such,  
32  
33  
34 82 it is compelling to extend the application of the SIDCER ICF methodology to clinical research  
35  
36  
37 83 requiring proxy consent. Therefore, the present study was designed to test the applicability and  
38  
39  
40 84 effectiveness of the SIDCER ICF in pediatric research requiring parental consent. The  
41  
42  
43 85 objective of this study was to compare the parental understanding of information between the  
44  
45  
46 86 parents who read the SIDCER ICF and those who read the conventional ICF.  
47  
48  
49  
50  
51  
52  
53  
54  
55  
56  
57  
58  
59  
60

## 87 **Materials and Methods**

88 This open-label, comparative, randomized-controlled study determined the  
89 effectiveness of two different ICFs – the SIDCER ICF and the conventional ICF (1:1) – on  
90 parental understanding of research-related information. The study protocol and related  
91 documents obtained ethical approval from the Institutional Review Board of Royal Thai Army  
92 Medical Department.

### 93 *Study participants*

94 Parents of children with transfusion-dependent thalassemia were informed about this  
95 ICF study and were recruited by study nurse at the Pediatric Outpatients Department,  
96 Phramongkutklao Hospital, Bangkok, Thailand. They were invited to read either the  
97 SIDCER ICF or the conventional ICF (by random assignment) for possible enrollment of their  
98 child (aged 1-18 years) in a drug trial which investigated the effects of furosemide on markers  
99 of volume overload in children with transfusion-dependent thalassemia.<sup>18</sup> Informed consent  
100 was obtained verbally and by action, that is, answering the questionnaire tacitly inferred their  
101 consent for participation in this ICF study.

102 This ICF study planned to enroll 210 parents (with 105 parents in each arm), based on  
103 an *a priori* estimate to detect the hypothesized effect size of 20% difference between two  
104 independent proportions of the primary endpoint ( $p_1 = 0.8$  and  $p_2 = 0.6$ ), with the precision and  
105 confidence level of 95%, 80% power and allocation ratio of 1, with a continuity correction.



1  
2  
3  
4 106 This hypothesized effect size was based on the findings in our previous study.<sup>19</sup>  
5  
6

7 107 *Study interventions*  
8  
9

10 108 The effectiveness of two different ICF interventions on parental understanding were  
11  
12  
13 109 compared: one was the original, standard ICF of the pediatric drug trial (in Thai) and another  
14  
15  
16 110 was the enhanced (SIDCER) ICF of the trial (in Thai). The former comprising six pages with  
17  
18  
19 111 2,065 words was considered as the conventional ICF; trial-related information was described  
20  
21  
22 112 using text in standard sequences. The latter comprising four pages with 1,644 words was  
23  
24  
25 113 developed according to the SIDCER ICF methodology, comprehensively described  
26  
27  
28 114 elsewhere.<sup>16</sup> In brief, essential information as is relevant to the parents' decision making was  
29  
30  
31 115 summarized in the SIDCER ICF template (available from [http://ijme.in/pdf/appendix-](http://ijme.in/pdf/appendix-1.pdf?v=1)  
32  
33  
34 116 [1.pdf?v=1](http://ijme.in/pdf/appendix-1.pdf?v=1)) in a narrative and illustrative manner, according to the SIDCER ICF principles. The  
35  
36  
37 117 drafted SIDCER ICF was, then, reviewed by laypersons to enhance the readability and  
38  
39  
40 118 understandability of written information. Both conventional and SIDCER ICFs contained the  
41  
42  
43 119 same content.  
44  
45

46 120 *Study outcomes*  
47  
48

49 121 Parental understanding of essential research-related information was measured using  
50  
51  
52 122 the questionnaire (in Thai), which was modified from our previous studies.<sup>17,19,20</sup> It consisted  
53  
54  
55 123 of 24 scenario-based questions which assessed parental understanding of relevant ICF content  
56  
57  
58 124 in the following categories: general items (five questions), patient's rights (four questions),  
59  
60

1  
2  
3  
4 125 scientific aspects (eight questions), and ethics aspects (seven questions). Each question with  
5  
6  
7 126 three possible answers was structured in a way that the parents would have had to apply their  
8  
9  
10 127 understanding of information given in an ICF to the scenario.<sup>21</sup> In each question, there was  
11  
12  
13 128 only one correct answer, counting as a score of 1, making the highest possible score 24. The  
14  
15  
16 129 primary endpoint was the proportion of parents obtaining the total score of more than 80%  
17  
18  
19 130 ( $\geq 20/24$ ). The secondary endpoints were the total score, the score of each category, and time  
20  
21  
22 131 spent reading a given ICF and completing the questionnaire.

### 23 24 25 132 *Study procedure*

26  
27  
28 133 For allocation of the parents, a computer-generated list of random numbers was  
29  
30  
31 134 applied, and a randomization code was packed in an opaque sealed envelope before subject  
32  
33  
34 135 enrollment to this ICF study. Eligible parents were randomly assigned to read either the  
35  
36  
37 136 SIDCER ICF or the conventional ICF. After that, the questionnaire was distributed. The parents  
38  
39  
40 137 could keep and read the ICF while completing the questionnaire, but they could not ask any  
41  
42  
43 138 questions during this process. Time spent reading the given ICF and completing the  
44  
45  
46 139 questionnaire was recorded and this was the end of the ICF study. The informed consent  
47  
48  
49 140 process continued for the clinical trial for both groups in the same manner, that is, informed  
50  
51  
52 141 consent discussion with the parents was conducted and any inaccurate understanding of trial  
53  
54  
55 142 information was explained prior to the parents' decision whether or not to sign consent for their  
56  
57  
58 143 child's participation in the pediatric drug trial.

1  
2  
3  
4 144 *Patient and public involvement*  
5  
6

7 145           The present study did not involve patients or publics during the development of  
8  
9  
10 146 research question and outcome measures as well as in the study design and recruitment plan.  
11  
12  
13 147 Patient burden was not assessed formally, but assumed to be low. Results will be disseminated  
14  
15  
16 148 via this publication, with a lay summary of the results in Thai.

17  
18  
19 149 *Data analysis*  
20  
21

22 150           Descriptive statistics were used to describe the basic features of the data in this study.  
23  
24  
25 151 The proportion of the parents in the SIDCER ICF group who achieved the outcome divided by  
26  
27  
28 152 that of the conventional ICF group was presented using the term 'relative risk' (RR).  
29  
30  
31 153 Dichotomous variables were compared using  $\chi^2$  test. Continuous variables were presented in  
32  
33  
34 154 mean  $\pm$  standard deviation (SD), and the values between the two groups were compared using  
35  
36  
37 155 the Student *t*-test. Cohen's *d* was used to classify the effect size as small ( $d = 0.2$ ), medium ( $d$   
38  
39  
40 156 = 0.5), and large ( $d = 0.8$ ).<sup>22</sup> Multivariable linear regression analysis was performed to evaluate  
41  
42  
43 157 the relationship between different ICF interventions and the total score after adjusting for age,  
44  
45  
46 158 gender, and education. All statistical analysis was executed using IBM SPSS Statistics for  
47  
48  
49 159 Windows, Version 22.0, with a *p* value of less than 0.05 considered to indicate statistical  
50  
51  
52 160 significance.  
53  
54  
55  
56  
57  
58  
59  
60

## 161 **Results**

162 Two hundred and ten parents of thalassemia children were enrolled between  
163 September 2015 and September 2016 and equally assigned to the SIDCER ICF group ( $n = 105$ )  
164 and the conventional ICF group ( $n = 105$ ) (Fig. 1). The mean age of 210 enrolled parents was  
165  $35.6 \pm 3.1$  years; 72.9% were female, and 61.0% had education at a bachelor degree or higher  
166 (Table 1).

167 The primary endpoint was achieved by 42.9% and 27.6% of the parents in the SIDCER  
168 ICF group and the conventional ICF group, respectively (RR = 1.552, 95%CI = 1.061 to 2.270,  
169  $p = 0.021$ ). The parents in the SIDCER ICF group obtained higher total scores when compared  
170 to the conventional ICF group (total score:  $18.07 \pm 3.71$  vs.  $15.98 \pm 4.56$ , mean difference =  
171  $2.09$ , 95% CI = 0.96 to 3.22,  $p < 0.001$ ). After adjustment for age, gender, and education, a  
172 significant difference in the total score between the two groups was still evident (B = 2.75, SE  
173 = 0.54, beta = 0.32, 95% CI = 1.69 to 3.81,  $p < 0.001$ ). The values of other secondary endpoints  
174 are presented in Table 2.

175 Proportions of the parents who correctly answered each element of the ICF content  
176 were compared between the two groups. The SIDCER ICF was found to be superior to the  
177 conventional ICF in improving parental understanding on five elements: who can access the  
178 data, right to receive new information, identification of experimental procedures, alternative  
179 course of treatment, and number of subjects required (Table 3). The element that was least

1  
2  
3  
4 180 understood by the parents in both groups was trial treatment and random assignment; only 66  
5  
6  
7 181 (out of 210) parents (31.4%) answered this element correctly.  
8  
9  
10  
11  
12  
13  
14  
15  
16  
17  
18  
19  
20  
21  
22  
23  
24  
25  
26  
27  
28  
29  
30  
31  
32  
33  
34  
35  
36  
37  
38  
39  
40  
41  
42  
43  
44  
45  
46  
47  
48  
49  
50  
51  
52  
53  
54  
55  
56  
57  
58  
59  
60

For peer review only

## 182 **Discussion**

183 This is the first randomized-controlled study which was designed to test the  
184 applicability and effectiveness of the SIDCER ICF methodology in a setting of pediatric drug  
185 trials. The SIDCER ICF was found to be superior to the conventional ICF in improving parental  
186 understanding of several elements of the ICF content. The overall results of this study are  
187 consistent with three previous informed consent studies that exhibited the improvement of  
188 participants' understanding by the SIDCER ICF.<sup>17,19,20</sup> In line with a recent integrative review  
189 on informed consent, it is reasonable to assume that the evidence of improved participants'  
190 understanding by the SIDCER ICF is largely attributable to its simplicity and concise format  
191 with increased processability (using summary boxes, highlights, and illustrations, when  
192 appropriate).<sup>23</sup>

193 Close examination of the data revealed that the SIDCER ICF was superior to the  
194 conventional ICF in improving the parental understanding of trial information in five elements:  
195 who can access the data, right to receive new information, identification of experimental  
196 procedures, alternative course of treatment, and number of subjects required. The first three  
197 elements were highlighted and made salient in the SIDCER ICF, whereas the same content was  
198 ordinarily described in the conventional ICF. It is reasonable to assume that a higher  
199 understanding of these three elements in the SIDCER ICF group was partly attributed to a  
200 complementary technique being used to convey key information. This might be the evidence

1  
2  
3  
4 201 to support that increased processability of key or complex information in an ICF could  
5  
6  
7 202 contribute to a significant improvement in parental understanding of such information.<sup>23</sup>  
8  
9

10 203 The element that was least understood by the parents in both groups was trial treatment  
11  
12  
13 204 and random assignment. This finding supports lines of the evidence demonstrating that there  
14  
15  
16 205 is the apparent universality of a limited understanding on the aspect of random allocation of  
17  
18  
19 206 the intervention in clinical trials.<sup>24-25</sup> Despite an attempt with increased processability in the  
20  
21  
22 207 SIDCER ICF to aid in description on the concept of randomization (using illustrations and  
23  
24  
25 208 highlights), a large proportion of the parents (63.8%) still did not understand it accurately. This  
26  
27  
28 209 emphasizes the need of increased attention in particular during informed consent discussion to  
29  
30  
31 210 ensure adequate understanding of this concept among individuals who consent to a trial.<sup>26</sup> A  
32  
33  
34 211 combination of the SIDCER ICF methodology with other means (*e.g.*, an integrated cognitive  
35  
36  
37 212 approach) may enhance parental understanding of this information in pediatric research.<sup>27</sup>  
38  
39

40 213 Although the overall results suggested that the SIDCER ICF was superior to the  
41  
42  
43 214 conventional ICF in this setting, the degree of parental understanding remained unsatisfactory.  
44  
45  
46 215 Deficiencies in understanding were still prevalent even among those who read the SIDCER  
47  
48  
49 216 ICF. Moreover, we have noticed that the level of parental understanding in this study is  
50  
51  
52 217 apparently lower than our observations in the previous ICF studies involving other groups of  
53  
54  
55 218 populations.<sup>17,19,20</sup> Continued consideration of the normative and practical aspects of informed  
56  
57  
58 219 consent is needed in an attempt to facilitate understanding among parents who act as proxies  
59  
60

1  
2  
3  
4 220 for their child's participation in research.<sup>28,29</sup> It may be worthwhile to consider using more  
5  
6  
7 221 graphics or pictographs to enhance visualization of complex information in the SIDCER ICF,<sup>30</sup>  
8  
9  
10 222 and further research may be required to determine the effectiveness of such additional means,  
11  
12  
13 223 especially in this group of populations. In addition to the enhanced ICF, a dialogue between  
14  
15  
16 224 the investigator (or a person designated by the investigator) and the parents are still  
17  
18  
19 225 indispensable, while complimentary methods of delivering trial-related information (*e.g.*, a  
20  
21  
22 226 multimedia video and website<sup>27</sup>) may be warranted in some studies. Furthermore, formal  
23  
24  
25 227 evaluation of parental understanding during the process of informed consent may be necessary,  
26  
27  
28 228 especially in pediatric research that poses relatively high risks, with little or no potential direct  
29  
30  
31 229 benefit, to child subjects.<sup>31,32</sup> Accordingly, any inaccuracy of parental understanding could be  
32  
33  
34 230 rectified to ascertain the validity of parental consent obtained in such research.

35  
36  
37 231 Of note, this study was confined to parental understanding of an ICF while the child's  
38  
39  
40 232 understanding of an assent form was not studied. It is also possible that the SIDCER ICF  
41  
42  
43 233 methodology may be modified and used to improve the quality of assent forms for pediatric  
44  
45  
46 234 populations. As such, further ICF studies involving pediatric populations are warranted.

47  
48  
49 235 In conclusion, the present study demonstrated that the SIDCER ICF methodology was  
50  
51  
52 236 applicable to pediatric research requiring parental consent and effective in improving parental  
53  
54  
55 237 understanding of trial information. However, deficiencies in understanding were still prevalent  
56  
57  
58 238 among the parents of child subjects, at least, in this setting, suggesting that further research is  
59  
60



1  
2  
3  
4  
5  
6  
7  
8  
9  
10  
11  
12  
13  
14  
15  
16  
17  
18  
19  
20  
21  
22  
23  
24  
25  
26  
27  
28  
29  
30  
31  
32  
33  
34  
35  
36  
37  
38  
39  
40  
41  
42  
43  
44  
45  
46  
47  
48  
49  
50  
51  
52  
53  
54  
55  
56  
57  
58  
59  
60

239 required to improve parental understanding in pediatric research.

For peer review only

1  
2  
3  
4 240 **Acknowledgements:** We thank Dr. Piyarat Simthamnimit and Dr. Chalinee Monsereenusorn,  
5  
6  
7 241 the investigators of the pediatric drug trial, for their collaboration. Thanks are extended to Ms.  
8  
9  
10 242 Chotimanee Kaewserm and her colleagues for their assistance in reviewing the SIDCER ICF  
11  
12  
13 243 from laypersons' perspectives.

14  
15  
16 244 **Contributor:** The study was designed by Nut Koonrungsesomboon and Juntra Karbwang, and  
17  
18  
19 245 conducted by Chanchai Traivaree and Charnunnut Tiyapsane. Data analysis was done by Nut  
20  
21  
22 246 Koonrungsesomboon. The manuscript was written by Nut Koonrungsesomboon and revised  
23  
24  
25 247 by Juntra Karbwang, with contributions from all authors. All authors approved the final version  
26  
27  
28 248 submitted.

29  
30  
31 249 **Funding:** This study was partially supported by Phramongkutklao Hospital and  
32  
33  
34 250 Phramongkutklao College of Medicine, Chiang Mai University, and TDR, the Special  
35  
36  
37 251 Programme for Research and Training in Tropical Diseases, co-sponsored by UNICEF, UNDP,  
38  
39  
40 252 the World Bank, and WHO through the Forum for Ethical Review Committees in the Asian  
41  
42  
43 253 and Western Pacific region (FERCAP). The funding sources had no role in the analysis and  
44  
45  
46 254 interpretation of the data; preparation, review or approval of the manuscript; and decision to  
47  
48  
49 255 submit this manuscript for publication.

50  
51  
52 256 **Competing interests:** We have read and understood BMJ policy on declaration of interests  
53  
54  
55 257 and declare that we have no competing interests.

56  
57  
58 258 **Ethics approval:** This study was approved by the Institutional Review Board of Royal Thai  
59  
60

1  
2  
3  
4 259 Army Medical Department (No. IRB/RTA1200/2557). Informed consent was obtained by

5  
6  
7 260 action.

8  
9  
10 261 **Data sharing statement:** Deidentified participant data will be available upon reasonable

11  
12  
13 262 request by contacting the corresponding author.  
14  
15  
16  
17  
18  
19  
20  
21  
22  
23  
24  
25  
26  
27  
28  
29  
30  
31  
32  
33  
34  
35  
36  
37  
38  
39  
40  
41  
42  
43  
44  
45  
46  
47  
48  
49  
50  
51  
52  
53  
54  
55  
56  
57  
58  
59  
60

For peer review only

1  
2  
3  
4 263 **References**  
5  
6

- 7 264 1. Roth-Cline M, Nelson RM. Parental permission and child assent in research on children.  
8  
9  
10 265 Yale J Biol Med 2013;86:291-301.  
11  
12  
13 266 2. Leibson T, Koren G. Informed consent in pediatric research. Paediatr Drugs 2015;17:5-11.  
14  
15  
16 267 3. Franck LS, Winter I, Oulton K. The quality of parental consent for research with children:  
17  
18  
19 268 a prospective repeated measure self-report survey. Int J Nurs Stud 2007;44:525-533.  
20  
21  
22 269 4. Pace C, Talisuna A, Wendler D, et al. Quality of parental consent in a Ugandan malaria  
23  
24  
25 270 study. Am J Public Health 2005;95:1184-1189.  
26  
27  
28 271 5. Chappuy H, Baruchel A, Leverger G, et al. Parental comprehension and satisfaction in  
29  
30  
31 272 informed consent in paediatric clinical trials: a prospective study on childhood leukaemia.  
32  
33  
34 273 Arch Dis Child 2010;95:800-804.  
35  
36  
37 274 6. Chappuy H, Doz F, Blanche S, et al. Parental consent in paediatric clinical research. Arch  
38  
39  
40 275 Dis Child 2006;91:112-116.  
41  
42  
43 276 7. Chappuy H, Bouazza N, Minard-Colin V, et al. Parental comprehension of the  
44  
45  
46 277 benefits/risks of first-line randomised clinical trials in children with solid tumours: a two-  
47  
48  
49 278 stage cross-sectional interview study. BMJ Open 2013;3:e002733.  
50  
51  
52 279 8. Sugarman J. Examining provisions related to consent in the revised Common Rule. Am J  
53  
54  
55 280 Bioeth 2017;17:22-26.  
56  
57  
58  
59  
60

- 1  
2  
3  
4 281 9. Hazen RA, Drotar D, Kodish E. The role of the consent document in informed consent for  
5  
6  
7 282 pediatric leukemia trials. *Contemp Clin Trials* 2007;28:401-408.  
8  
9  
10 283 10. Berger O, Grønberg BH, Sand K, et al. The length of consent documents in oncological  
11  
12  
13 284 trials is doubled in twenty years. *Ann Oncol* 2009;20:379-385.  
14  
15  
16 285 11. Kass NE, Chaisson L, Taylor HA, Lohse J. Length and complexity of US and international  
17  
18  
19 286 HIV consent forms from federal HIV network trials. *J Gen Intern Med* 2011;26:1324-1328.  
20  
21  
22 287 12. Wen G, Liu X, Huang L, et al. Readability and content assessment of informed consent  
23  
24  
25 288 forms for phase II-IV clinical trials in China. *PLoS One* 2016;11:e0164251.  
26  
27  
28 289 13. Villafranca A, Kereliuk S, Hamlin C, et al. The appropriateness of language found in  
29  
30  
31 290 research consent form templates: a computational linguistic analysis. *PLoS One*  
32  
33  
34 291 2017;12:30169143.  
35  
36  
37 292 14. Bhutta ZA. Beyond informed consent. *Bull World Health Organ* 2004;82:771-777.  
38  
39  
40 293 15. Nishimura A, Carey J, Erwin PJ, et al. Improving understanding in the research informed  
41  
42  
43 294 consent process: a systematic review of 54 interventions tested in randomized control trials.  
44  
45  
46 295 *BMC Med Ethics* 2013;14:28.  
47  
48  
49 296 16. Koonrunsesomboon N, Laothavorn J, Chokevivat V, et al. SIDCER informed consent  
50  
51  
52 297 form: principles and a developmental guideline. *Indian J Med Ethics* 2016;1:83-86.  
53  
54  
55 298 17. Koonrunsesomboon N, Tharavanij T, Phiphatpatthamaamphan K, et al. Improved  
56  
57  
58 299 participants' understanding of research information in real settings using the SIDCER  
59  
60

- 1  
2  
3  
4 300 informed consent form: a randomized-controlled informed consent study nested with eight  
5  
6  
7 301 clinical trials. *Eur J Clin Pharmacol* 2017;73:141-149.  
8  
9  
10 302 18. Simthamnimit P, Traivaree C, Monsereenusorn C, Torcharus K. Efficacy of furosemide for  
11  
12  
13 303 prevention of volume overload in children with transfusion-dependent thalassemia at  
14  
15  
16 304 Phramongkutklao Hospital. *Royal Thai Army Med J* 2015;68:81-82.  
17  
18  
19 305 19. Koonrunsesomboon N, Teekachunhatean S, Hanprasertpong N, et al. Improved  
20  
21  
22 306 participants' understanding in a healthy volunteer study using the SIDCER informed  
23  
24  
25 307 consent form: a randomized-controlled study. *Eur J Clin Pharmacol* 2016;72:413-421.  
26  
27  
28 308 20. Koonrunsesomboon N, Traivaree C, Chamnanvanakij S, et al. Improved pregnant  
29  
30  
31 309 women's understanding of research information by an enhanced informed consent form: a  
32  
33  
34 310 randomised controlled study nested in neonatal research. *Arch Dis Child Fetal Neonatal Ed*  
35  
36  
37 311 2018;103:F403-F407.  
38  
39  
40 312 21. Koonrunsesomboon N, Laothavorn J, Karbwang J. Understanding of essential elements  
41  
42  
43 313 required in informed consent form among researchers and institutional review board  
44  
45  
46 314 members. *Trop Med Health* 2015;43:117-122.  
47  
48  
49 315 22. Kim HY. Statistical notes for clinical researchers: effect size. *Restor Dent Endod*  
50  
51  
52 316 2015;40:328-331.  
53  
54  
55 317 23. Foe G, Larson EL. Reading level and comprehension of research consent forms: an  
56  
57  
58 318 integrative review. *J Empir Res Hum Res Ethics* 2016;11:31-46.  
59  
60

- 1  
2  
3  
4 319 24. Kupst MJ, Patenaude AF, Walco GA, Sterling C. Clinical trials in pediatric cancer: parental  
5  
6  
7 320 perspectives on informed consent. *J Pediatr Hematol Oncol* 2003;25:787-790.  
8  
9  
10 321 25. Kodish E, Eder M, Noll RB, et al. Communication of randomization in childhood leukemia  
11  
12  
13 322 trials. *JAMA* 2004;291:470-475.  
14  
15  
16 323 26. Carvalho AA, Costa LR. Mothers' perceptions of their child's enrollment in a randomized  
17  
18  
19 324 clinical trial: poor understanding, vulnerability and contradictory feelings. *BMC Med*  
20  
21  
22 325 *Ethics* 2013;14:52.  
23  
24  
25 326 27. Antal H, Bunnell HT, McCahan SM, et al. A cognitive approach for design of a multimedia  
26  
27  
28 327 informed consent video and website in pediatric research. *J Biomed Inform* 2017;66:248-  
29  
30  
31 328 258.  
32  
33  
34 329 28. Shilling V, Young B. How do parents experience being asked to enter a child in a  
35  
36  
37 330 randomised controlled trial? *BMC Med Ethics* 2009;10:1.  
38  
39  
40 331 29. Alahmad G. Informed consent in pediatric oncology: a systematic review of qualitative  
41  
42  
43 332 literature. *Cancer Control* 2018;25:1073274818773720.  
44  
45  
46 333 30. Tait AR, Voepel-Lewis T, Zikmund-Fisher BJ, Fagerlin A. The effect of format on parents'  
47  
48  
49 334 understanding of the risks and benefits of clinical research: a comparison between text,  
50  
51  
52 335 tables, and graphics. *J Health Commun* 2010;15:487-501.  
53  
54  
55 336 31. Wendler D. How to enroll participants in research ethically. *JAMA* 2011;305:1587-1588.  
56  
57  
58  
59  
60

- 1  
2  
3  
4 337 32. Bromwich D, Rid A. Can informed consent to research be adapted to risk? J Med Ethics  
5  
6  
7 338 2015;41:521-528.  
8  
9  
10  
11  
12  
13  
14  
15  
16  
17  
18  
19  
20  
21  
22  
23  
24  
25  
26  
27  
28  
29  
30  
31  
32  
33  
34  
35  
36  
37  
38  
39  
40  
41  
42  
43  
44  
45  
46  
47  
48  
49  
50  
51  
52  
53  
54  
55  
56  
57  
58  
59  
60

For peer review only



339 **Table 1** Demographic data of the parents (*n* = 210)

|                          | SIDCER ICF<br>( <i>n</i> = 105) | Conventional ICF<br>( <i>n</i> = 105) |
|--------------------------|---------------------------------|---------------------------------------|
| <b>Gender (n)</b>        |                                 |                                       |
| Male                     | 30 (28.6%)                      | 27 (25.7%)                            |
| Female                   | 75 (71.4%)                      | 78 (74.3%)                            |
| <b>Age (year)</b>        | 33.9 ± 12.7                     | 37.4 ± 13.3                           |
| <b>Education (n)</b>     |                                 |                                       |
| High school or below     | 49 (46.7%)                      | 33 (31.4%)                            |
| Bachelor degree or above | 56 (53.3%)                      | 72 (68.6%)                            |

340 Data represent the number (percentage) of parents or mean ± SD.

341 **Table 2** Comparisons of the total score, the score in each category of the ICF content, and time  
 342 spent between the two groups

|                                                   | <b>SIDCER<br/>ICF<br/>(n = 105)</b> | <b>Conventional<br/>ICF<br/>(n = 105)</b> | <b>Mean<br/>difference</b> | <b>95% CI</b>     | <b>p value*</b> | <b>Effect<br/>size**</b> |
|---------------------------------------------------|-------------------------------------|-------------------------------------------|----------------------------|-------------------|-----------------|--------------------------|
| Total score (out of 24)                           | 18.07 ± 3.71                        | 15.98 ± 4.56                              | 2.09                       | (0.96 to 3.22)    | <0.001          | 0.49                     |
| Score in the general items (out of 5)             | 3.99 ± 1.05                         | 3.71 ± 1.16                               | 0.28                       | (-0.03 to 0.58)   | 0.072           | 0.25                     |
| Score in the patient's rights (out of 4)          | 3.41 ± 0.83                         | 3.23 ± 1.07                               | 0.18                       | (-0.08 to 0.44)   | 0.172           | 0.19                     |
| Score in the scientific aspects (out of 8)        | 5.51 ± 1.70                         | 4.50 ± 1.80                               | 1.02                       | (0.54 to 1.50)    | <0.001          | 0.56                     |
| Score in the ethics aspects (out of 7)            | 5.15 ± 1.52                         | 4.54 ± 1.74                               | 0.61                       | (0.17 to 1.05)    | 0.007           | 0.37                     |
| Time spent reading a given ICF (minutes)          | 23.61 ± 12.51                       | 30.90 ± 15.45                             | -7.30                      | (-11.12 to -3.47) | <0.001          | 0.50                     |
| Time spent completing the questionnaire (minutes) | 24.48 ± 12.84                       | 30.59 ± 13.29                             | -6.11                      | (-9.67 to -2.56)  | 0.001           | 0.46                     |

343 Data represent mean ± SD. \*Student *t*-test. \*\*Cohen's *d* value.

344 **Table 3** Comparisons of the parental understanding of each element of the ICF content between  
 345 the two groups

|                                               | SIDCER ICF<br>(n = 105) | Conventional<br>ICF (n = 105) | Relative Risk (95%CI) | p value* |
|-----------------------------------------------|-------------------------|-------------------------------|-----------------------|----------|
| <b>General items</b>                          |                         |                               |                       |          |
| 1. Recognition that this is research          | 80 (76.2%)              | 78 (74.3%)                    | 1.026 (0.878-1.198)   | 0.749    |
| 2. Subjects' responsibility                   | 85 (81.0%)              | 84 (80.0%)                    | 1.012 (0.886-1.156)   | 0.862    |
| 3. Confidentiality of records                 | 74 (70.5%)              | 64 (61.0%)                    | 1.156 (0.950-1.408)   | 0.146    |
| 4. Who can access the data                    | 82 (78.1%)              | 68 (64.8%)                    | 1.206 (1.014-1.435)   | 0.032    |
| 5. Research contact persons                   | 98 (93.3%)              | 96 (91.4%)                    | 1.021 (0.944-1.103)   | 0.603    |
| <b>Patient's rights</b>                       |                         |                               |                       |          |
| 6. Right to refuse                            | 76 (72.4%)              | 87 (82.9%)                    | 0.874 (0.754-1.012)   | 0.069    |
| 7. Right to withdraw                          | 95 (90.5%)              | 87 (82.9%)                    | 1.092 (0.981-1.215)   | 0.104    |
| 8. Consequences of withdrawal                 | 96 (91.4%)              | 87 (82.9%)                    | 1.103 (0.994-1.225)   | 0.064    |
| 9. Right to receive new information           | 91 (86.7%)              | 78 (74.3%)                    | 1.167 (1.019-1.336)   | 0.024    |
| <b>Scientific aspects</b>                     |                         |                               |                       |          |
| 10. Eligibility of the subject                | 81 (77.1%)              | 72 (68.6%)                    | 1.125 (0.953-1.328)   | 0.163    |
| 11. Number of subjects required               | 87 (82.9%)              | 43 (41.0%)                    | 2.023 (1.583-2.587)   | <0.001   |
| 12. Purpose of the study                      | 80 (76.2%)              | 75 (71.4%)                    | 1.067 (0.908-1.254)   | 0.433    |
| 13. Trial treatment and random assignment     | 38 (36.2%)              | 28 (26.7%)                    | 1.357 (0.904-2.038)   | 0.137    |
| 14. Trial procedures                          | 65 (61.9%)              | 52 (49.5%)                    | 1.250 (0.979-1.596)   | 0.071    |
| 15. Identification of experimental procedures | 80 (76.2%)              | 66 (62.9%)                    | 1.212 (1.011-1.454)   | 0.036    |
| 16. Duration of the subject's participation   | 88 (83.8%)              | 79 (75.2%)                    | 1.114 (0.970-1.279)   | 0.124    |
| 17. Storage and reuse of human materials      | 60 (57.1%)              | 57 (54.3%)                    | 1.053 (0.827-1.340)   | 0.677    |
| <b>Ethics aspects</b>                         |                         |                               |                       |          |
| 18. Alternative course of treatment           | 94 (89.5%)              | 82 (78.1%)                    | 1.146 (1.016-1.293)   | 0.025    |
| 19. Foreseeable risks                         | 70 (66.7%)              | 61 (58.1%)                    | 1.148 (0.929-1.418)   | 0.200    |
| 20. Expected direct/indirect benefits         | 52 (49.5%)              | 42 (40.0%)                    | 1.238 (0.914-1.677)   | 0.165    |
| 21. Post-trial benefits                       | 82 (78.1%)              | 72 (68.6%)                    | 1.139 (0.966-1.342)   | 0.119    |
| 22. Prorated payment for participation        | 91 (86.7%)              | 84 (80.0%)                    | 1.083 (0.959-1.223)   | 0.195    |
| 23. Anticipated expenses                      | 60 (57.1%)              | 53 (50.5%)                    | 1.132 (0.880-1.456)   | 0.333    |
| 24. Compensation for injury                   | 92 (87.6%)              | 83 (79.0%)                    | 1.108 (0.981-1.252)   | 0.096    |

346 Data represent the number (percentage) of parents. \* $\chi^2$  test.

1  
2  
3  
4 347 **Figure legends**

5  
6  
7 348 **Fig. 1** Flow diagram of this ICF study  
8  
9  
10  
11  
12  
13  
14  
15  
16  
17  
18  
19  
20  
21  
22  
23  
24  
25  
26  
27  
28  
29  
30  
31  
32  
33  
34  
35  
36  
37  
38  
39  
40  
41  
42  
43  
44  
45  
46  
47  
48  
49  
50  
51  
52  
53  
54  
55  
56  
57  
58  
59  
60

For peer review only

1  
2  
3  
4  
5  
6  
7  
8  
9  
10  
11  
12  
13  
14  
15  
16  
17  
18  
19  
20  
21  
22  
23  
24  
25  
26  
27  
28  
29  
30  
31  
32  
33  
34  
35  
36  
37  
38  
39  
40  
41  
42  
43  
44  
45  
46  
47  
48  
49  
50  
51  
52  
53  
54  
55  
56  
57  
58  
59  
60



Fig. 1 Flow diagram of this ICF study

227x98mm (300 x 300 DPI)

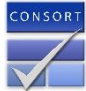

## CONSORT 2010 checklist of information to include when reporting a randomised trial\*

| Section/Topic                    | Item No | Checklist item                                                                                                                                                                              | Reported on page No |
|----------------------------------|---------|---------------------------------------------------------------------------------------------------------------------------------------------------------------------------------------------|---------------------|
| <b>Title and abstract</b>        |         |                                                                                                                                                                                             |                     |
|                                  | 1a      | Identification as a randomised trial in the title                                                                                                                                           | 1                   |
|                                  | 1b      | Structured summary of trial design, methods, results, and conclusions (for specific guidance see CONSORT for abstracts)                                                                     | 3-4                 |
| <b>Introduction</b>              |         |                                                                                                                                                                                             |                     |
| Background and objectives        | 2a      | Scientific background and explanation of rationale                                                                                                                                          | 6-7                 |
|                                  | 2b      | Specific objectives or hypotheses                                                                                                                                                           | 7                   |
| <b>Methods</b>                   |         |                                                                                                                                                                                             |                     |
| Trial design                     | 3a      | Description of trial design (such as parallel, factorial) including allocation ratio                                                                                                        | 8                   |
|                                  | 3b      | Important changes to methods after trial commencement (such as eligibility criteria), with reasons                                                                                          | n/a                 |
| Participants                     | 4a      | Eligibility criteria for participants                                                                                                                                                       | 8                   |
|                                  | 4b      | Settings and locations where the data were collected                                                                                                                                        | 8                   |
| Interventions                    | 5       | The interventions for each group with sufficient details to allow replication, including how and when they were actually administered                                                       | 9                   |
| Outcomes                         | 6a      | Completely defined pre-specified primary and secondary outcome measures, including how and when they were assessed                                                                          | 9-10                |
|                                  | 6b      | Any changes to trial outcomes after the trial commenced, with reasons                                                                                                                       | n/a                 |
| Sample size                      | 7a      | How sample size was determined                                                                                                                                                              | 8-9                 |
|                                  | 7b      | When applicable, explanation of any interim analyses and stopping guidelines                                                                                                                | n/a                 |
| <b>Randomisation:</b>            |         |                                                                                                                                                                                             |                     |
| Sequence generation              | 8a      | Method used to generate the random allocation sequence                                                                                                                                      | 10                  |
|                                  | 8b      | Type of randomisation; details of any restriction (such as blocking and block size)                                                                                                         | 10                  |
| Allocation concealment mechanism | 9       | Mechanism used to implement the random allocation sequence (such as sequentially numbered containers), describing any steps taken to conceal the sequence until interventions were assigned | 10                  |
|                                  | 10      | Who generated the random allocation sequence, who enrolled participants, and who assigned participants to interventions                                                                     | 10                  |

|    |                          |     |                                                                                                                                           |          |
|----|--------------------------|-----|-------------------------------------------------------------------------------------------------------------------------------------------|----------|
| 1  | Blinding                 | 11a | If done, who was blinded after assignment to interventions (for example, participants, care providers, those assessing outcomes) and how  | n/a      |
| 2  |                          |     |                                                                                                                                           |          |
| 3  |                          | 11b | If relevant, description of the similarity of interventions                                                                               | n/a      |
| 4  | Statistical methods      | 12a | Statistical methods used to compare groups for primary and secondary outcomes                                                             | 11       |
| 5  |                          | 12b | Methods for additional analyses, such as subgroup analyses and adjusted analyses                                                          | 11       |
| 6  |                          |     |                                                                                                                                           |          |
| 7  | <b>Results</b>           |     |                                                                                                                                           |          |
| 8  | Participant flow (a      | 13a | For each group, the numbers of participants who were randomly assigned, received intended treatment, and                                  | 12       |
| 9  | diagram is strongly      |     | were analysed for the primary outcome                                                                                                     |          |
| 10 | recommended)             | 13b | For each group, losses and exclusions after randomisation, together with reasons                                                          | n/a      |
| 11 | Recruitment              | 14a | Dates defining the periods of recruitment and follow-up                                                                                   | 12       |
| 12 |                          | 14b | Why the trial ended or was stopped                                                                                                        | n/a      |
| 13 | Baseline data            | 15  | A table showing baseline demographic and clinical characteristics for each group                                                          | Table 1  |
| 14 | Numbers analysed         | 16  | For each group, number of participants (denominator) included in each analysis and whether the analysis was by original assigned groups   | Fig. 1   |
| 15 |                          |     |                                                                                                                                           |          |
| 16 | Outcomes and             | 17a | For each primary and secondary outcome, results for each group, and the estimated effect size and its                                     | 12-13,   |
| 17 | estimation               |     | precision (such as 95% confidence interval)                                                                                               | Tables 2 |
| 18 |                          | 17b | For binary outcomes, presentation of both absolute and relative effect sizes is recommended                                               | 12-13    |
| 19 | Ancillary analyses       | 18  | Results of any other analyses performed, including subgroup analyses and adjusted analyses, distinguishing pre-specified from exploratory | 12-13,   |
| 20 |                          |     |                                                                                                                                           | Table 3  |
| 21 | Harms                    | 19  | All important harms or unintended effects in each group (for specific guidance see CONSORT for harms)                                     | n/a      |
| 22 |                          |     |                                                                                                                                           |          |
| 23 | <b>Discussion</b>        |     |                                                                                                                                           |          |
| 24 | Limitations              | 20  | Trial limitations, addressing sources of potential bias, imprecision, and, if relevant, multiplicity of analyses                          | 14-16    |
| 25 | Generalisability         | 21  | Generalisability (external validity, applicability) of the trial findings                                                                 | 14-16    |
| 26 | Interpretation           | 22  | Interpretation consistent with results, balancing benefits and harms, and considering other relevant evidence                             | 14-16    |
| 27 |                          |     |                                                                                                                                           |          |
| 28 | <b>Other information</b> |     |                                                                                                                                           |          |
| 29 | Registration             | 23  | Registration number and name of trial registry                                                                                            | n/a      |
| 30 | Protocol                 | 24  | Where the full trial protocol can be accessed, if available                                                                               | n/a      |
| 31 | Funding                  | 25  | Sources of funding and other support (such as supply of drugs), role of funders                                                           | 17       |

n/a, not applicable
